# Supplementary material for: Energy access in informal settlements to achieve the Sustainable Development Goals
Source: Research Square preprint supplement (doi:10.21203/rs.3.rs-102995/v1), 2021-03-23
Supplement: Supplementary file 1 [file 8cb46163a97700580a0bf80e.xlsx]

## Sheet: Sheet 1
		Will the provision of electricity/LPG access in Kibera enable or inhibit the achievement of the Target, and/or the achievement of the Target enable or inhibit the provision of electricity/LPG access?								How will the interventions for electricity/LPG access in Kibera impact the achievement of the Target?
	GOAL OR TARGET IN THE 2030 AGENDA FOR SUSTAINABLE DEVELOPMENT	Electricity				LPG				Electricity Interventions							LPG Interventions
		Enable	Inhibit	Reasoning	Sample Reference	Enable	Inhibit	Reasoning	Sample Reference	Enable	Inhibit	Intervention Outcome	Intervention	Reasoning	Considerations	Sample Reference	Enable	Inhibit	Interventions Outcome	Intervention	Reasoning	Considerations	Sample Reference
Goal 1: End poverty in all its forms everywhere
1.1	By 2030, eradicate extreme poverty for all people everywhere, currently measured as people living on less than $1.25 a day	1		Proven interlinkages between provision of access to modern energy services, living standards and income. Expansion of the grid could support the creation of new jobs and the provision of electricity services.	(1) Willcox et al. 2015. Utilising Electricity Access for Poverty Reduction (Practical Action Consulting) (2) Karekezi et al. 2008. Energy Access for the Urban Poor (AFREPEN/FWD)	1		Proven interlinkages between provision of access to modern energy services, living standards and income.	(1) Hussein & Filho. 2012. Analysis of energy as a precondition for improvement of living conditions and poverty reduction in sub-Saharan Africa (2) Sesan. 2015. Scale Versus Substance? Lessons from a Context-Responsive Approach to Market-Based Stove Development in Western Kenya (Decentralized Solutions for Developing Economies)	1		Strenghten Enablers	Strengthening Supply Chain Community Engagement	Expansion of distribution grid networks and community participation means improved availability of electricity and the creation of new jobs	Interventions must be inclusive of residents in informal settlements.	(1) GNESD 2014. Country report (Kenya). Energy poverty in developing countries' urban poor communities: assessments and recommendations. Urban and Peri-urban energy access III (2) The World Bank & ESMAP. 2015. Bringing global best practices to transform Kenya's slum electrification program.	1		Strengthen Enablers	Strengthening Supply Chain	Increase the number of LPG outlets and/or the establishment of local enterprises as distributors and dealers in Kibera means improved availability of LPG and the creation of new jobs	Dependence on LPG imports ultimatley limits the energy sovereignty of Kenya.	(1) Sesan. 2015. Scale Versus Substance? Lessons from a Context-Responsive Approach to Market-Based Stove Development in Western Kenya (Decentralized Solutions for Developing Economies) (2) Kojima. 2011. The Role of Liquified Petroleum Gas in Reducing Energy Poverty (World Bank)
1.2	By 2030, reduce at least by half the proportion of men, women and children of all ages living in poverty in all its dimensions according to national definitions	1		As 1.1		1		As 1.1		1		Strenghten Enablers	Strengthening Supply Chain Community Engagement	Expansion of distribution grid networks and community participation means improved availability of electricity and the creation of new jobs	Interventions must be inclusive of residents in informal settlements.	(1) GNESD 2014. Country report (Kenya). Energy poverty in developing countries' urban poor communities: assessments and recommendations. Urban and Peri-urban energy access III (2) The World Bank & ESMAP. 2015. Bringing global best practices to transform Kenya's slum electrification program.	1		Strengthen Enablers	Strengthening Supply Chain	Increase the number of LPG outlets and/or the establishment of local enterprises as distributors and dealers in Kibera means improved availability of LPG the creation of new jobs	Dependence on LPG imports ultimatley limits the energy sovereignty of Kenya.	(1) Sesan. 2015. Scale Versus Substance? Lessons from a Context-Responsive Approach to Market-Based Stove Development in Western Kenya (Decentralized Solutions for Developing Economies) (2) Kojima. 2011. The Role of Liquified Petroleum Gas in Reducing Energy Poverty (World Bank)
1.3	Implement nationally appropriate social protection systems and measures for all, including floors, and by 2030 achieve substantial coverage of the poor and the vulnerable	1	1	Evidence that social protection measures can include energy access measures. Financing innovations can make electricity more affordable to lower-income households provided they reach the targeted households.	(1) Fuso Nerini et al. 2018. Mapping the Synergies and Trade-offs between energy and the Sustainable Development Goals (Nature Energy). (2) de Bercegol & Monstadt. 2018.The Kenya Slum Electrification Program: Local politics of electricity networks in Kibera (Energy Research & Social Science)	1	1	Social protection measures can include energy access measures provided they reach targeted households.	(1) Fuso Nerini et al. 2018. Mapping the Synergies and Trade-offs between energy and the Sustainable Development Goals (Nature Energy). (2) Gan & Van Leeuwen. 2019. Sustainable Development Goals the Contribution of LPG (Global LPG Partnership (GLPGP) and the World LPG Association (WLPGA)) (3) Kojima. 2011. The Role of Liquified Petroleum Gas in Reducing Energy Poverty (World Bank)	1		Strengthen Enablers Overcome Inhibitiors	Political Recognition Financial Incentives	Political recognition of Kibera means consideration of informal settlements in national policy and decision-making and inclusion of energy needs ot households. Direct financial incentives - subsidies, lifeline tariffs - improves affordability of electricity for households.	Policy must be context-responsive, appropriately implemented and monitored. Direct financial incentives must be implemented to ensure they reach targeted households and achieve policy goals.	(1) GNESD 2014. Country report (Kenya). Energy poverty in developing countries' urban poor communities: assessments and recommendations. Urban and Peri-urban energy access III (2) de Bercegol & Monstadt. 2018.The Kenya Slum Electrification Program: Local politics of electricity networks in Kibera (Energy Research & Social Science)	1		Strengthen Enablers Overcome Inhibitiors	Political Recognition Financial Incentives	Consideration of informal settlements in national policy and decision-making and inclusion of the energy needs of households. Direct financial incentives - subsidies, removal of VAT, micro-finance - improves affordability of LPG for households.	Policy must be context-responsive, appropriatley implemented and monitored. Direct financial incentives must be implemeneted and monitored to ensure they reach targeted households and achieve policy goals.	(1) Kojima. 2011. The Role of Liquified Petroleum Gas in Reducing Energy Poverty (World Bank) (2) Puzzolo et al. 2019. Supply considerations for scaling up clean cooking fuels for household energy in low‐ and middle‐income countries. (GeoHealth) (3) GNESD 2014. Country report (Kenya). Energy poverty in developing countries' urban poor communities: assessments and recommendations. Urban and Peri-u…
1.4	By 2030, ensure that all men and women, in particular the poor and the vulnerable, have equal rights to economic resources, as well as access to basic services, ownership and control over land and other forms of property, inheritance, natural resources, appropriate new technology and financial services, including microfinance	1	1	As 1.3		1	1	As 1.3		1		Strengthen Enablers Overcome Inhibitors	Political Recognition Financial Incentives	Political recognition of Kibera means consideration of informal settlements in national policy and decision-making and inclusion of energy needs ot households. Direct financial incentives - subsidies, lifeline tariffs - improves affordability of electricity for households.	Policy must be context-responsive, appropriately implemented and monitored. Direct financial incentives must be implemented to ensure they reach targeted households and achieve policy goals.	(1) GNESD 2014. Country report (Kenya). Energy poverty in developing countries' urban poor communities: assessments and recommendations. Urban and Peri-urban energy access III (2) de Bercegol & Monstadt. 2018.The Kenya Slum Electrification Program: Local politics of electricity networks in Kibera (Energy Research & Social Science)	1		Strengthen Enablers Overcome Inhibitors	Political Recognition Financial Incentives	Consideration of informal settlements in national policy and decision-making and inclusion of the energy needs of households. Direct financial incentives - subsidies, removal of VAT, micro-finance - improves affordability of LPG for households.	Policy must be context-responsive, appropriatley implemented and monitored. Direct financial incentives must be implmeneted and monitored to ensure they reach targeted households and achieve policy goals.	(1) Kojima. 2011. The Role of Liquified Petroleum Gas in Reducing Energy Poverty (World Bank) (2) Puzzolo et al. 2019. Supply considerations for scaling up clean cooking fuels for household energy in low‐ and middle‐income countries. (GeoHealth) (3) GNESD 2014. Country report (Kenya). Energy poverty in developing countries' urban poor communities: assessments and recommendations. Urban and Peri-u…
1.5	By 2030, build the resilience of the poor and those in vulnerable situations and reduce their exposure and vulnerability to climate-related extreme events and other economic, social and environmental shocks and disasters	1		Legal electricity for lighting, as a substitute for alternative to fossil-based fuels, reduces the impact of fluctuation in the global oil price.	(1) Karekezi et al. 2008. Energy Access for the Urban Poor (AFREPEN/FWD)		1	Kenya has no domestic reserves of crude oil and is dependent on imports, the price of which is elastic with global oil prices.	(1) Kojima. 2011. The Role of Liquified Petroleum Gas in Reducing Energy Poverty (World Bank) (2) van den Berg. 2018. Kenya’s Strategy to Make Liquified Petroleum Gas the Nation’s Primary Cooking Fuel (World Bank)	1		Strengthen Enablers	Strengthening Supply Chain	Increase of Renewable Energy Sources for electricity generation reduces dependence on fuel imports.	Climate resilient power generation	(1) GNESD 2014. Country report (Kenya). Energy poverty in developing countries' urban poor communities: assessments and recommendations. Urban and Peri-urban energy access III	1	1	Create Enablers Limit Inhibitors	Strengthening Supply Chain	Domestic reserves of LPG improves supply security, stabilises prices, and enables import economy of scale but Kenya remains dependent on imports.	Dependence on LPG imports ultimatley limits the energy sovereignty of Kenya.	(1) Kojima. 2011. The Role of Liquified Petroleum Gas in Reducing Energy Poverty (World Bank) (2) van den Berg. 2018. Kenya’s Strategy to Make Liquified Petroleum Gas the Nation’s Primary Cooking Fuel (World Bank) (3) Munro et al. 2017. Energy justice for all? Rethinking SDG 7 through struggles over traditional energy practices in Sierra Leone (Energy Policy) (4) Matthews 2014. Opportunities and …
1.a	Ensure significant mobilization of resources from a variety of sources, including through enhanced development cooperation, in order to provide adequate and predictable means for developing countries, in particular least developed countries, to implement programmes and policies to end poverty in all its dimensions	1		"Kenya Slum Electrification Program" "Kenya Electricity System Improvement Project" and "The Last Mile Connectivity" are enabled through external support.	(1) Kenya Power. 2019. Kenya Electricity System Improvement Project Resettlement Policy Framework (2) African Development Fund. 2014. Last Mile Connectivity Project. (3)The World Bank. 2015. Bringing global best practices to transform Kenya's slum electrification program.	1		Cross-sectoral initiatives, private-public partnerships, NGOs programmes supported by Kenya's Ministry of Energy and Petroleum to promote the use of LPG	(1) SE4All. 2016. Kenya Action Agenda (Government of Kenya)	1		Interlinkages Stand			"Kenya Slum Electrification Program" "Kenya Electricity System Improvement Project" and "The Last Mile Connectivity" are enabled through external support.	(1) Kenya Power. 2019. Kenya Electricity System Improvement Project Resettlement Policy Framework (2) African Development Fund. 2014. Last Mile Connectivity Project. (3)The World Bank. 2015. Bringing global best practices to transform Kenya's slum electrification program.	1		Interlinkages Stand			Cooperation and knowledge sharing above the locale of LPG supply chain and realised through existing initiatives, partnerships and programmes e.g. World Bank, GACC.	(1) GNESD 2014. Country report (Kenya). Energy poverty in developing countries' urban poor communities: assessments and recommendations. Urban and Peri-urban energy access III.
1.b	Create sound policy frameworks at the national, regional and international levels, based on pro-poor and gender-sensitive development strategies, to support accelerated investment in poverty eradication actions	1	1	A sound "pro poor" policy framework takes into account the potential of electricity for poverty eradiction provided it is context-responsive.	(1) de Bercegol & Monstadt. 2018.The Kenya Slum Electrification Program: Local politics of electricity networks in Kibera (Energy Research & Social Science)	1	1	Success of initiatives such as Kenya Petroleum Technical Assistance Project (KEPTAP) aiming to strengthen Kenyan petroleum supply chain and capacity measured against indicators that include effective policies. A sound "pro poor" policy framework takes into account the potential of LPG for poverty eradiction, provided is context-responsive.	(1) World Bank. 2020. Kenya Petroleum Technical Assistance Project (KEPTAP) (World Bank) (2) de Bercegol & Monstadt. 2018.The Kenya Slum Electrification Program: Local politics of electricity networks in Kibera (Energy Research & Social Science)	1		Strengthen Enablers Overcome Inhibitiors	Political Recognition Financial Incentives	Political recognition of Kibera means consideration of informal settlements in national policy and decision-making and inclusion of the energy needs of households. Direct financial incentives - subsidies, flexible paying, lifeline tariffs - improve affordability of electricity for households.	Policy must be context-responsive, appropriatley implemented and monitored to achieve goals. Direct financial incentives - subsidies, flexible paying, lifeline tariffs - improve affordability of electricity for households.	(1) Singh et al. 2015. Energy access realities in urban poor communities of developing countries: assessments and recommendations (GNESD) (2) de Bercegol & Monstadt. 2018.The Kenya Slum Electrification Program: Local politics of electricity networks in Kibera (Energy Research & Social Science)	1		Strengthen Enablers Overcome Inhibitors	Political Recognition Strengthening Supply Chain	Consideration of informal settlements in national policy and decision-making and inclusion of the energy needs of households. Domestic reserves of LPG improves supply security, stabilises prices, and enables import economy of scale but Kenya remains dependent on imports.	Policy must be context-responsive, appropriatley implemented and monitored to achieve goals.	(1) Singh et al. 2015. Energy access realities in urban poor communities of developing countries: assessments and recommendations (GNESD) (2) Kojima. 2011. The Role of Liquified Petroleum Gas in Reducing Energy Poverty (World Bank)
Goal 2. End hunger, achieve food security and improved nutrition, and promote sustainable agriculture
2.1	By 2030, end hunger and ensure access by all people, in particular the poor and people in vulnerable situations, including infants, to safe, nutritious and sufficient food all year round	1	1	Electricity access reduces the household burden on women and/or allow household-based labour activities with positive consequences for child care, which, combined with lesser exposure to environmental contamination, may result in improved child nutritional status. Electricity access supports household appliances. unaffordable energy can increase burden on household income.	(1) Gallaher et al. 2013. Urban agriculture, social capital, and food security in the Kibera slums of Nairobi, Kenya (Agriculture & Human Values) (2) Karekezi et al. 2008. Energy Access for the Urban Poor (AFREPEN/FWD) (3) de Bercegol & Monstadt. 2018.The Kenya Slum Electrification Program: Local politics of electricity networks in Kibera (Energy Research & Social Science)	1	1	LPG access reduces the household burden on women and/or allows household-based labour activities with positive consequences for child care, which, combined with lesser exposure to environmental contamination, may result in improved child nutritional status. Unaffordable energy access can increase the burden on household income.	(1) Faye et al. 2011. Hunger and Food Insecurity in Nairobi’s Slums: An Assessment Using IRT Models(Journal of Urban Health) (2) Gan & Van Leeuwen. 2019. Sustainable Development Goals the Contribution of LPG (Global LPG Partnership (GLPGP) and the World LPG Association (WLPGA)) (3) Karekezi et al. 2008. Energy Access for the Urban Poor (AFREPEN/FWD)	1		Overcome Inhibitiors	Financial Incentives	Direct financial incentives - subsidies, flexible paying, lifeline tariffs - improve affordability of electricity for households.	Direct financial incentives must be implemented and monitored to ensure they reach targeted households and achieve policy goals.	(1) GNESD 2014. Country report (Kenya). Energy poverty in developing countries' urban poor communities: assessments and recommendations. Urban and Peri-urban energy access III. (2) The World Bank & ESMAP. 2015. Bringing global best practices to transform Kenya's slum electrification program	1		Overcome Inhibitors	Financial Incentives	Direct financial incentives - subsidies, removal of VAT, micro-finance - improves affordability of LPG for households.	Direct financial incentives must be implemented and monitored to ensure they reach targeted households and achieve policy goals.	(1) GNESD 2014. Country report (Kenya). Energy poverty in developing countries' urban poor communities: assessments and recommendations. Urban and Peri-urban energy access III. (2) Puzzolo et al. 2019. Supply considerations for scaling up clean cooking fuels for household energy in low‐ and middle‐income countries. (GeoHealth) (3) Kojima. 2011. The Role of Liquified Petroleum Gas in Reducing Ener…
2.2	By 2030, end all forms of malnutrition, including achieving, by 2025, the internationally agreed targets on stunting and wasting in children under 5 years of age, and address the nutritional needs of adolescent girls, pregnant and lactating women and older persons	1	1	As 2.1 Electricity access for productive purposes can increase household income level and therefore allow for the purchase tools for urban agriculture which can increase food security and increase the variety of food, particularly vegetables, consumed.	(1) Gallaher et al. 2013. Urban agriculture, social capital, and food security in the Kibera slums of Nairobi, Kenya (Agriculture & Human Values) (2) Karekezi et al. 2008. Energy Access for the Urban Poor (AFREPEN/FWD)	1	1	As 2.1 LPG access for productive purposes can increase household income level and therefore allow for the purchase tools for urban agriculture which can increase food security and the variety of food, particularly vegetables, consumed.	(1) Gallaher et al. 2013. Urban agriculture, social capital, and food security in the Kibera slums of Nairobi, Kenya (Agriculture & Human Values) (2) Karekezi et al. 2008. Energy Access for the Urban Poor (AFREPEN/FWD)	1		Strengthen Enablers Overcome Inhibitiors	Financial Incentives	Direct financial incentives - subsidies, flexible paying, lifeline tariffs - improve affordability of electricity for households.	Direct financial incentives must be implemented and monitored to ensure they reach targeted households and achieve policy goals.	(1) GNESD 2014. Country report (Kenya). Energy poverty in developing countries' urban poor communities: assessments and recommendations. Urban and Peri-urban energy access III. (2) The World Bank & ESMAP. 2015. Bringing global best practices to transform Kenya's slum electrification program	1		Strengthen Enablers Overcome Inhibitors	Financial Incentives	Direct financial incentives - subsidies, removal of VAT, micro-finance - improves affordability of LPG for households.	Direct financial incentives must be implmeneted and monitored to ensure they reach targeted households and achieve policy goals.	(1) GNESD 2014. Country report (Kenya). Energy poverty in developing countries' urban poor communities: assessments and recommendations. Urban and Peri-urban energy access III. (2) Puzzolo et al. 2019. Supply considerations for scaling up clean cooking fuels for household energy in low‐ and middle‐income countries. (GeoHealth) (3) Kojima. 2011. The Role of Liquified Petroleum Gas in Reducing Ener…
2.3	By 2030, double the agricultural productivity and incomes of small-scale food producers, in particular women, indigenous peoples, family farmers, pastoralists and fishers, including through secure and equal access to land, other productive resources and inputs, knowledge, financial services, markets and opportunities for value addition and non-farm employment
2.4	By 2030, ensure sustainable food production systems and implement resilient agricultural practices that increase productivity and production, that help maintain ecosystems, that strengthen capacity for adaptation to climate change, extreme weather, drought, flooding and other disasters and that progressively improve land and soil quality
2.5	By 2020, maintain the genetic diversity of seeds, cultivated plants and farmed and domesticated animals and their related wild species, including through soundly managed and diversified seed and plant banks at the national, regional and international levels, and promote access to and fair and equitable sharing of benefits arising from the utilization of genetic resources and associated traditiona…
2.a	Increase investment, including through enhanced international cooperation, in rural infrastructure, agricultural research and extension services, technology development and plant and livestock gene banks in order to enhance agricultural productive capacity in developing countries, in particular least developed countries
2.b	Correct and prevent trade restrictions and distortions in world agricultural markets, including through the parallel elimination of all forms of agricultural export subsidies and all export measures with equivalent effect, in accordance with the mandate of the Doha Development Round
2.c	Adopt measures to ensure the proper functioning of food commodity markets and their derivatives and facilitate timely access to market information, including on food reserves, in order to help limit extreme food price volatility
Goal 3. Ensure healthy lives and promote wellbeing for all at all ages
3.1	By 2030, reduce the global maternal mortality ratio to less than 70 per 100,000 live births	1	1	Electricity access alleviates chronic respiratory problems of women by reducing IAP and reducing the household burden of women and associated health risks and supports ICT. Electricity through fossil-based sources contributes to ambient air pollution.	(1) Youssef et al. 2016. Energy Consumption and Health Outcomes in Africa (Journal of Energy & Development) (2) International Energy Agency. 2016. Energy and Air Pollution	1		LPG access alleviates chronic respiratory problems of women by reducing IAP and the household burden of women and associated health risks	(1) Youssef et al. 2016. Energy Consumption and Health Outcomes in Africa (Journal of Energy & Development) (2) Gan & Van Leeuwen. 2019. Sustainable Development Goals the Contribution of LPG (Global LPG Partnership (GLPGP) and the World LPG Association (WLPGA))	1	1	Strengthen Enablers Limit Inhibitor	Strengthening Supply Chain Financial Incentives	Introduction of Renewable Energy Sources in electricity generation reduces ambient air pollution. Financial incentives that increase electricity consumption do not take source into account.	Increased electricity consumption must consider energy sources to reduce overall air pollution.	(1) GNESD 2014. Country report (Kenya). Energy poverty in developing countries' urban poor communities: assessments and recommendations. Urban and Peri-urban energy access III. (2) The World Bank & ESMAP. 2018. Kenya National Electrification Strategy Key Highlights. (3) Whitley S. and van der Burg, L., 2015. Fossil Fuel Subsidy Reform in Sub-Saharan Africa: From Rhetoric to Reality. New Climate E…	1		Strengthen Enablers	Political Recognition Community Engagement	Consideration of informal settlements in national policy and decision-making and inclusion of the gender and energy needs of households Programmes to raise awareness educate households about the effects of IAP.	Policy must be context-responsive, appropriatley implemented and monitored. Must be context-reponsive and consider the fuel preferences of households.	(1) GNESD 2014. Country report (Kenya). Energy poverty in developing countries' urban poor communities: assessments and recommendations. Urban and Peri-urban energy access III. (2) van den Berg. 2018. Kenya’s Strategy to Make Liquified Petroleum Gas the Nation’s Primary Cooking Fuel (World Bank) (3) ENERGIA. 2019. Gender in the transition to sustainable energy for all: From evidence to inclusive …
3.2	By 2030, end preventable deaths of newborns and children under 5 years of age, with all countries aiming to reduce neonatal mortality to at least as low as 12 per 1,000 live births and under-5 mortality to at least as low as 25 per 1,000 live births	1	1	Electricity reduces IAP, reducing neonatal and under-five mortality and pneumonia in children. Electricity through fossil-based sources contributes to ambient air pollution.	(1) International Energy Agency. 2016. Energy and Air Pollution (2) Sverdlik. 2011. Ill-health and poverty: a literature review on health in informal settlements (Environment & Urbanisation)	1		LPG reduces IAP, reducing neonatal and under-five mortality and pneumonia in children	(1) Gan & Van Leeuwen. 2019. Sustainable Development Goals the Contribution of LPG (Global LPG Partnership (GLPGP) and the World LPG Association (WLPGA)) (2) Sverdlik. 2011. Ill-health and poverty: a literature review on health in informal settlements (Environment & Urbanisation)	1	1	Strengthen Enablers Limit Inhibitor	Political Recignition Strengthening Supply Chain Community Engagement Financial Incentives	Introduction of Renewable Energy Sources in electricity generation reduces ambient air pollution. Raising awareness on safe and efficient use of electricity. Financial incentives that increase electricity consumption do not take source into account. Political recognition of Kibera means recognition of the vulnerable position of children in informal settlements	Increased electricity consumption must consider energy sources to reduce overall air pollution.	(1) GNESD 2014. Country report (Kenya). Energy poverty in developing countries' urban poor communities: assessments and recommendations. Urban and Peri-urban energy access III. (2) The World Bank & ESMAP. 2018. Kenya National Electrification Strategy Key Highlights. (3) Whitley S. and van der Burg, L., 2015. Fossil Fuel Subsidy Reform in Sub-Saharan Africa: From Rhetoric to Reality. New Climate E…	1		Strengthen Enablers	Community Engagement	Programmes to raise awareness educate households about the effects of IAP.	LPG reduces IAP, reducing neonatal and under-five mortality and pneumonia in children	(1) Gan & Van Leeuwen. 2019. Sustainable Development Goals the Contribution of LPG (Global LPG Partnership (GLPGP) and the World LPG Association (WLPGA)) (2) Sverdlik. 2011. Ill-health and poverty: a literature review on health in informal settlements (Environment & Urbanisation)
3.3	By 2030, end the epidemics of AIDS, tuberculosis, malaria and neglected tropical diseases and combat hepatitis, water-borne diseases and other communicable diseases
3.4	By 2030, reduce by one third premature mortality from non-communicable diseases through prevention and treatment and promote mental health and well-being	1	1	Electricity reduces IAP which causes respiratory problems including pneumonia, COPD, asthma, TB and is also associated with elevated risk of cataracts, low birth weight, cancer and cardiovascular failure. Electricity through fossil-based sources contributes to ambient air pollution.	(1) International Energy Agency. 2016.Energy and Air Pollution (2) Sverdlik. 2011. Ill-health and poverty: a literature review on health in informal settlements (International Institute for Environment and Development) (3) Youssef et al. 2016. Energy Consumption and Health Outcomes in Africa (Journal of Energy & Development)	1		LPG reduces IAP which causes respiratory problems including pneumonia, COPD, asthma, TB and is also associated with elevated risk of cataracts, low birth weight, cancer and cardiovascular failure	(1) Gan & Van Leeuwen. 2019. Sustainable Development Goals the Contribution of LPG (Global LPG Partnership (GLPGP) and the World LPG Association (WLPGA)) (2) Sverdlik. 2011. Ill-health and poverty: a literature review on health in informal settlements (Environment & Urbanisation)	1	1	Strengthen Enablers Limit Inhibitor	Strengthening Supply Chain Community Engagement Financial Incentives	Introduction of Renewable Energy Sources in electricity generation reduces ambient air pollution. Raising awareness on safe and efficient use of electricity. Financial incentives that increase electricity consumption do not take source into account.	Increased electricity consumption must consider energy sources to reduce overall air pollution.	(1) GNESD 2014. Country report (Kenya). Energy poverty in developing countries' urban poor communities: assessments and recommendations. Urban and Peri-urban energy access III. (2) The World Bank & ESMAP. 2018. Kenya National Electrification Strategy Key Highlights. (3) Whitley and van der Burg. 2015. Fossil Fuel Subsidy Reform in Sub-Saharan Africa: From Rhetoric to Reality. New Climate Economy,…	1		Strengthen Enabler	Community Engagement	Programmes to raise awareness educate households about the effects of IAP.	Must be context-responsive and consider the fuel preferences of households.	(1) Kojima. 2011. The Role of Liquified Petroleum Gas in Reducing Energy Poverty (World Bank) (2) Puzzolo et al. 2019. Supply considerations for scaling up clean cooking fuels for household energy in low‐ and middle‐income countries. (GeoHealth) (3) GNESD 2014. Country report (Kenya). Energy poverty in developing countries' urban poor communities: assessments and recommendations. Urban and Peri-u…
3.5	Strengthen the prevention and treatment of substance abuse, including narcotic drug abuse and harmful use of alcohol
3.6	By 2020, halve the number of global deaths and injuries from road traffic accidents
3.7	By 2030, ensure universal access to sexual and reproductive health-care services, including for family planning, information and education, and the integration of reproductive health into national strategies and programmes
3.8	Achieve universal health coverage, including financial risk protection, access to quality essential health-care services and access to safe, effective, quality and affordable essential medicines and vaccines for all
3.9	By 2030, substantially reduce the number of deaths and illnesses from hazardous chemicals and air, water and soil pollution and contamination	1	1	As 3.1 and 3.2		1	1	LPG, as a substitute, removes risk of accidental ingestion of kerosene. LPG, as a substitute for biomass, reduces the physical hazards of open-fires and debris piles. Incorrect handling and storage of LPG can cause leaking. Leaked LPG settles to the ground, increasing the risk of casualties in the event of fire/explosion.	(1) GNESD 2014. Country report (South Africa). Energy poverty in developing countries' urban poor communities: assessments and recommendations. Urban and Peri-urban energy access III. (Global Network on Energy for Sustainable Development by Energy Research Centre, University of Cape Town) (2) Sverdlik. 2011. Ill-health and poverty: a literature review on health in informal settlements (Environmen…	1	1	Strengthen Enablers Limit Inhibitor	Strengthening Supply Chain Community Engagement Financial Incentives	Introduction of Renewable Energy Sources in electricity generation reduces ambient air pollution. Raising awareness on safe and efficient use of electricity. Financial incentives that increase electricity consumption do not take source into account.	Increased electricity consumption must consider energy sources to reduce overall air pollution.	(1) GNESD 2014. Country report (Kenya). Energy poverty in developing countries' urban poor communities: assessments and recommendations. Urban and Peri-urban energy access III. (2) The World Bank & ESMAP. 2018. Kenya National Electrification Strategy Key Highlights. (3) Whitley and van der Burg. 2015. Fossil Fuel Subsidy Reform in Sub-Saharan Africa: From Rhetoric to Reality. New Climate Economy,…	1		Overcome Inhibtors	Strengthen LPG Supply Chain Community Engagement	Standardise LPG cylinders and appliances and enforcement of national standards, laws, regulations and monitoring mechanisms reduces safety risk of LPG. Programmes to raise awareness educate households in the safe use and storage of LPG.	Programmes to raise awareness must be context-reponsive and consider the fuel preferences of households	(1) Kojima. 2011. The Role of Liquified Petroleum Gas in Reducing Energy Poverty (World Bank) (2) Puzzolo et al. 2019. Supply considerations for scaling up clean cooking fuels for household energy in low‐ and middle‐income countries. (GeoHealth) (3) GNESD 2014. Country report (Kenya). Energy poverty in developing countries' urban poor communities: assessments and recommendations. Urban and Peri-u…
3.a	Strengthen the implementation of the World Health Organization Framework Convention on Tobacco Control in all countries, as appropriate
3.b	Support the research and development of vaccines and medicines for the communicable and non-communicable diseases that primarily affect developing countries, provide access to affordable essential medicines and vaccines, in accordance with the Doha Declaration on the TRIPS Agreement and Public Health, which affirms the right of developing countries to use to the full the provisions in the Agreeme…
3.c	Substantially increase health financing and the recruitment, development, training and retention of the health workforce in developing countries, especially in least developed countries and small island developing States
3.d	Strengthen the capacity of all countries, in particular developing countries, for early warning, risk reduction and management of national and global health risks	1		Electricity access supports ICT.	(1) Armey & Hosman. 2016. The centrality of electricity to ICT use in low-income countries. (Telecommunications Policy)					1		Interlinkage Stand	Community Engagement	Awareness programmes can educate households on the safe and efficient use of electricity.		(1) GNESD 2014. Country report (Kenya). Energy poverty in developing countries' urban poor communities: assessments and recommendations. Urban and Peri-urban energy access III.
Goal 4. Ensure inclusive and equitable quality education and promote life-long learning opportunities for all
4.1	By 2030, ensure that all girls and boys complete free, equitable and quality primary and secondary education leading to relevant and effective learning outcomes	1		Electricity access reduces household burden on children, improving school attendance and allowing for study at home.	(1) UNDP. 2011. Towards an ‘Energy Plus’ Approach For The Poor. A review of good practices and lessons learned from Asia and the Pacific (United Nations Development Programme) (2) Sovacool. 2012. The political economy of energy poverty: A review of key challenges (Energy for Sustainable Development)	1		LPG access reduces household burden on children, improving school attendance.	(1) UNDP. 2011. Towards an ‘Energy Plus’ Approach For The Poor. A review of good practices and lessons learned from Asia and the Pacific (United Nations Development Programme) (2) Sovacool. 2012. The political economy of energy poverty: A review of key challenges (Energy for Sustainable Development)	1		Interlinkages Stand			Electricity access reduces household burden on children, improving school attendance and allowing for study at home.	(1) UNDP. 2011. Towards an ‘Energy Plus’ Approach For The Poor. A review of good practices and lessons learned from Asia and the Pacific (United Nations Development Programme) (2) Sovacool. 2012. The political economy of energy poverty: A review of key challenges (Energy for Sustainable Development)	1		Interlinkages Stand			LPG access reduces household burdens on children, improving school attendance.	(1) UNDP. 2011. Towards an ‘Energy Plus’ Approach For The Poor. A review of good practices and lessons learned from Asia and the Pacific (United Nations Development Programme) (2) Sovacool. 2012. The political economy of energy poverty: A review of key challenges (Energy for Sustainable Development)
4.2	By 2030, ensure that all girls and boys have access to quality early childhood development, care and pre-primary education so that they are ready for primary education	1		Reduced IAP alleviates acute respiratory infections in children reducing school absences.	(1) UNDP. 2011. Towards an ‘Energy Plus’ Approach For The Poor. A review of good practices and lessons learned from Asia and the Pacific (United Nations Development Programme)	1		Reduced IAP alleviates acute respiratory infections in children, reducing school absences.	(1) UNDP. 2011. Towards an ‘Energy Plus’ Approach For The Poor. A review of good practices and lessons learned from Asia and the Pacific (United Nations Development Programme)	1		Interlinkages Stand			Reduced IAP alleviates acute respiratory infections in children reducing school absences.	(1) UNDP. 2011. Towards an ‘Energy Plus’ Approach For The Poor. A review of good practices and lessons learned from Asia and the Pacific (United Nations Development Programme)	1		Interlinkages Stand			LPG access reduces household burdens on children, improving school attendance.	(1) UNDP. 2011. Towards an ‘Energy Plus’ Approach For The Poor. A review of good practices and lessons learned from Asia and the Pacific (United Nations Development Programme) (2) Sovacool. 2012. The political economy of energy poverty: A review of key challenges (Energy for Sustainable Development)
4.3	By 2030, ensure equal access for all women and men to affordable and quality technical, vocational and tertiary education, including university	1		Electricity access reduces household burdens on women and children allowing them to be employed productively.	(1) UNDP. 2011. Towards an ‘Energy Plus’ Approach For The Poor. A review of good practices and lessons learned from Asia and the Pacific (United Nations Development Programme)	1		LPG access reduces household burden on women and children allowing them to be employed productively.	(1) UNDP. 2011. Towards an ‘Energy Plus’ Approach For The Poor. A review of good practices and lessons learned from Asia and the Pacific (United Nations Development Programme)	1		Strengthen Enablers	Strengthening Supply Chain Community Engagement	Expansion of distribution grid networks and community engagement can lead to the creation of new jobs. Programmes to raise awareness to safe and efficient electricity use can be utilised as a educative platform for households.	Interventions must be inclusive of residents in informal settlements, empowering youth and gender.	(1) GNESD 2014. Country report (Kenya). Energy poverty in developing countries' urban poor communities: assessments and recommendations. Urban and Peri-urban energy access III (2) The World Bank & ESMAP. 2015. Bringing global best practices to transform Kenya's slum electrification program.	1		Strengthen Enablers	Strengthening Supply Chain Community Engagement	Increase the number of LPG outlets and/or the establishment of local enterprises as distributors and dealers in Kibera means improved availability of LPG the creation of new jobs Programmes to raise awareness in the safe use and storage of LPG can be utilised as a educative platform for households.	LPG outlets and local enterprises must be inclusive, empowering youth and gender	(1) Sesan. 2015. Scale Versus Substance? Lessons from a Context-Responsive Approach to Market-Based Stove Development in Western Kenya (Decentralized Solutions for Developing Economies) (2) Kojima. 2011. The Role of Liquified Petroleum Gas in Reducing Energy Poverty (World Bank)
4.4	By 2030, substantially increase the number of youth and adults who have relevant skills, including technical and vocational skills, for employment, decent jobs and entrepreneurship	1		Electricity enables productive employment in SMEs and within the supply chain for the fuel	(1) de Bercegol & Monstadt. 2018.The Kenya Slum Electrification Program: Local politics of electricity networks in Kibera (Energy Research & Social Science) (2) World Bank. 2015. Bringing global best practices to transform Kenya's slum electrification program.	1		As 4.1. LPG enables productive employment in SMEs and within the supply chain for the fuel	(1) Gan & Van Leeuwen. 2019. Sustainable Development Goals the Contribution of LPG (Global LPG Partnership (GLPGP) and the World LPG Association (WLPGA))	1		Strengthen Enablers	Strengthening Supply Chain Community Engagement	Expansion of distribution grid networks and community engagement can lead to the creation of new jobs. Programmes to raise awareness to safe and efficient electricity use can be utilised as a educative platform for households.	Interventions must be inclusive of residents in informal settlements, empowering youth and gender.	(1) GNESD 2014. Country report (Kenya). Energy poverty in developing countries' urban poor communities: assessments and recommendations. Urban and Peri-urban energy access III (2) The World Bank & ESMAP. 2015. Bringing global best practices to transform Kenya's slum electrification program.	1		Strengthen Enablers	Strengthening Supply Chain Community Engagement	Increase the number of LPG outlets and/or the establishment of local enterprises as distributors and dealers in Kibera means improved availability of LPG the creation of new jobs Programmes to raise awareness in the safe use and storage of LPG can be utilised as a educative platform for households.	LPG outlets and local enterprises must be inclusive, empowering youth and gender	(1) Sesan. 2015. Scale Versus Substance? Lessons from a Context-Responsive Approach to Market-Based Stove Development in Western Kenya (Decentralized Solutions for Developing Economies) (2) Kojima. 2011. The Role of Liquified Petroleum Gas in Reducing Energy Poverty (World Bank)
4.5	By 2030, eliminate gender disparities in education and ensure equal access to all levels of education and vocational training for the vulnerable, including persons with disabilities, indigenous peoples and children in vulnerable situations	1		As 4.3 Access to clean energy sources imperative to achieve gender equality.	(1) Sovacool. 2012. The political economy of energy poverty: A review of key challenges (Energy for Sustainable Development)	1		As 4.3 Access to clean energy sources imperative to achieve gender equality.	(1) Sovacool. 2012. The political economy of energy poverty: A review of key challenges (Energy for Sustainable Development)	1		Strengthen Enablers	Strengthening Supply Chain Community Engagement	Expansion of distribution grid networks and community engagement can lead to the creation of new jobs. Programmes to raise awareness to safe and efficient electricity use can be utilised as a educative platform for households.	Interventions must be inclusive of residents in informal settlements, empowering youth and gender.	(1) GNESD 2014. Country report (Kenya). Energy poverty in developing countries' urban poor communities: assessments and recommendations. Urban and Peri-urban energy access III (2) The World Bank & ESMAP. 2015. Bringing global best practices to transform Kenya's slum electrification program.	1		Strengthen Enablers	Strengthening Supply Chain Community Engagement	Increase the number of LPG outlets and/or the establishment of local enterprises as distributors and dealers in Kibera means improved availability of LPG the creation of new jobs Programmes to raise awareness in the safe use and storage of LPG can be utilised as a educative platform for households.	LPG outlets and local enterprises must be inclusive, empowering youth and gender	(1) Sesan. 2015. Scale Versus Substance? Lessons from a Context-Responsive Approach to Market-Based Stove Development in Western Kenya (Decentralized Solutions for Developing Economies) (2) Kojima. 2011. The Role of Liquified Petroleum Gas in Reducing Energy Poverty (World Bank)
4.6	By 2030, ensure that all youth and a substantial proportion of adults, both men and women, achieve literacy and numeracy	1		As 4.1 and 4.3		1		As 4.1 and 4.3		1		Interlinkages Stand			Interventions must be inclusive of residents in informal settlements, empowering youth and gender.	(1) GNESD 2014. Country report (Kenya). Energy poverty in developing countries' urban poor communities: assessments and recommendations. Urban and Peri-urban energy access III (2) The World Bank & ESMAP. 2015. Bringing global best practices to transform Kenya's slum electrification program.	1		Interlinkages Stand			Increase the number of LPG outlets and/or the establishment of local enterprises as distributors and dealers in Kibera means improved availability of LPG the creation of new jobs	(1) Sesan. 2015. Scale Versus Substance? Lessons from a Context-Responsive Approach to Market-Based Stove Development in Western Kenya (Decentralized Solutions for Developing Economies) (2) Kojima. 2011. The Role of Liquified Petroleum Gas in Reducing Energy Poverty (World Bank)
4.7	By 2030, ensure that all learners acquire the knowledge and skills needed to promote sustainable development, including, among others, through education for sustainable development and sustainable lifestyles, human rights, gender equality, promotion of a culture of peace and non-violence, global citizenship and appreciation of cultural diversity and of culture’s contribution to sustainable develo…	1		As 4.1 and 4.3		1		As 4.1 and 4.3	(1) Kojima. 2011. The Role of Liquified Petroleum Gas in Reducing Energy Poverty (World Bank)	1		Strengthen Enablers	Strengthening Supply Chain Community Engagement	Expansion of distribution grid networks and community engagement can lead to the creation of new jobs. Programmes to raise awareness to safe and efficient electricity use can be utilised as a educative platform for households.	Interventions must be inclusive of residents in informal settlements, empowering youth and gender.	(1) GNESD 2014. Country report (Kenya). Energy poverty in developing countries' urban poor communities: assessments and recommendations. Urban and Peri-urban energy access III (2) The World Bank & ESMAP. 2015. Bringing global best practices to transform Kenya's slum electrification program.	1		Strengthen Enablers	Strengthening Supply Chain Community Engagement	Increase the number of LPG outlets and/or the establishment of local enterprises as distributors and dealers in Kibera means improved availability of LPG the creation of new jobs Programmes to raise awareness in the safe use and storage of LPG can be utilised as a educative platform for households.	LPG outlets and local enterprises must be inclusive, empowering youth and gender Programmes to raise awareness must be context-reponsive and consider the fuel preferences of households	(1) Sesan. 2015. Scale Versus Substance? Lessons from a Context-Responsive Approach to Market-Based Stove Development in Western Kenya (Decentralized Solutions for Developing Economies) (2) Kojima. 2011. The Role of Liquified Petroleum Gas in Reducing Energy Poverty (World Bank)
4.a	Build and upgrade education facilities that are child, disability and gender sensitive and provide safe, non-violent, inclusive and effective learning environments for all
4.b	By 2020, substantially expand globally the number of scholarships available to developing countries, in particular least developed countries, small island developing States and African countries, for enrolment in higher education, including vocational training and information and communications technology, technical, engineering and scientific programmes, in developed countries and other developi…
4.c	By 2030, substantially increase the supply of qualified teachers, including through international cooperation for teacher training in developing countries, especially least developed countries and small island developing States
Goal 5. Achieve gender equality and empower all women and girls
5.1	End all forms of discrimination against all women and girls everywhere	1		Electricity access can reduce the household burden on women, engage women in employment and empower otherwise marginalised groups socio-economically.	(1) ENERGIA. 2019. Gender in the transition to sustainable energy for all: From evidence to inclusive policies (International Network on Gender & Energy) (2) World Bank. 2013. Integrating Gender Considerations into Energy Operations. (3) UNDP. 2011. Towards an ‘Energy Plus’ Approach For The Poor. A review of good practices and lessons learned from Asia and the Pacific (United Nations Development …	1		LPG access can reduce the household burden on women, engage women in employment and empower otherwise marginalised groups socio-economically.	(1) UNDP. 2011. Towards an ‘Energy Plus’ Approach For The Poor. A review of good practices and lessons learned from Asia and the Pacific (United Nations Development Programme) (2) Sesan. 2015. Scale Versus Substance? Lessons from a Context-Responsive Approach to Market-Based Stove Development in Western Kenya (Decentralized Solutions for Developing Economies)	1		Strengthen Enablers	Politcal Recognition Financial Incentives	Political recognition of Kibera means consideration of informal settlements in national policy and decision-making and inclusion of the gender and energy needs of households. Direct financial incentives - subsidies, flexible paying - increases ability of women to pay for energy.	Policy must be context-responsive and gender aware, appropriatley implemented and monitored. Direct financial incentives must be implmeneted and monitored to ensure they reach targeted households and achieve policy goals.	(1) GNESD 2014. Country report (Kenya). Energy poverty in developing countries' urban poor communities: assessments and recommendations. Urban and Peri-urban energy access III. (2) ENERGIA. 2019. Gender in the transition to sustainable energy for all: From evidence to inclusive policies (International Network on Gender & Energy)	1		Strengthen Enablers	Political Recognition Strengthening Supply Chain Financial Incentives	Consideration of informal settlements in national policy and decision-making and inclusion of the gender and energy needs of households. Increase the number of LPG outlets and/or the establishment of local enterprises as distributors and dealers in Kibera means the creation of new jobs Direct financial incentives - subsidies, removal of VAT, micro-finance - improves affordability and enables wome…	Policy must be context-responsive, appropriatley implemented and monitored. LPG outlets and local enterprises must be inclusive, empowering youth and gender Direct financial incentives must be implmeneted and monitored to ensure they reach targeted households and achieve policy goals.	(1) Sesan. 2015. Scale Versus Substance? Lessons from a Context-Responsive Approach to Market-Based Stove Development in Western Kenya (Decentralized Solutions for Developing Economies) (2) GNESD 2014. Country report (Kenya). Energy poverty in developing countries' urban poor communities: assessments and recommendations. Urban and Peri-urban energy access III. (3) ENERGIA. 2019. Gender in the tra…
5.2	Eliminate all forms of violence against all women and girls in the public and private spheres, including trafficking and sexual and other types of exploitation	1		As 5.1		1		As 5.1		1		Strengthen Enablers	Politcal Recognition Financial Incentives	Political recognition of Kibera means consideration of informal settlements in national policy and decision-making and inclusion of the gender and energy needs of households. Direct Financial Incentives - subsidies, flexible paying - increases ability of women to pay for energy.	Policy must be context-responsive and gender aware, appropriatley implemented and monitored. Direct financial incentives must be implmeneted and monitored to ensure they reach targeted households and achieve policy goals.	(1) GNESD 2014. Country report (Kenya). Energy poverty in developing countries' urban poor communities: assessments and recommendations. Urban and Peri-urban energy access III. (2) ENERGIA. 2019. Gender in the transition to sustainable energy for all: From evidence to inclusive policies (International Network on Gender & Energy)	1		Strengthen Enablers	Political Recognition Strengthening Supply Chain Financial Incentives	Consideration of informal settlements in national policy and decision-making and inclusion of the gender and energy needs of households. Increase the number of LPG outlets and/or the establishment of local enterprises as distributors and dealers in Kibera means the creation of new jobs Direct financial incentives - subsidies, removal of VAT, micro-finance - improves affordability and enables wome…	Policy must be context-responsive, appropriatley implemented and monitored. LPG outlets and local enterprises must be inclusive, empowering youth and gender Direct financial incentives must be implmeneted and monitored to ensure they reach targeted households and achieve policy goals.	(1) Sesan. 2015. Scale Versus Substance? Lessons from a Context-Responsive Approach to Market-Based Stove Development in Western Kenya (Decentralized Solutions for Developing Economies) (2) GNESD 2014. Country report (Kenya). Energy poverty in developing countries' urban poor communities: assessments and recommendations. Urban and Peri-urban energy access III. (3) ENERGIA. 2019. Gender in the tra…
5.3	Eliminate all harmful practices, such as child, early and forced marriage and female genital mutilation
5.4	Recognize and value unpaid care and domestic work through the provision of public services, infrastructure and social protection policies and the promotion of shared responsibility within the household and the family as nationally appropriate	1		As 5.1		1		As 5.1		1		Strengthen Enablers	Political Recognition	Political recognition of Kibera means consideration of informal settlements in national policy and decision-making and inclusion of the gender and energy needs of households.	Policy must be context-responsive, appropriatley implemented and monitored.	(1) GNESD 2014. Country report (Kenya). Energy poverty in developing countries' urban poor communities: assessments and recommendations. Urban and Peri-urban energy access III. (2) ENERGIA. 2019. Gender in the transition to sustainable energy for all: From evidence to inclusive policies (International Network on Gender & Energy)	1		Strengthen Enablers	Political Recognition	Consideration of informal settlements in national policy and decision-making and inclusion of the gender and energy needs of households	Policy must be context-responsive, appropriatley implemented and monitored.	(1) Sesan. 2015. Scale Versus Substance? Lessons from a Context-Responsive Approach to Market-Based Stove Development in Western Kenya (Decentralized Solutions for Developing Economies) (2) GNESD 2014. Country report (Kenya). Energy poverty in developing countries' urban poor communities: assessments and recommendations. Urban and Peri-urban energy access III. (3) ENERGIA. 2019. Gender in the tra…
5.5	Ensure women’s full and effective participation and equal opportunities for leadership at all levels of decision-making in political, economic and public life	1	1	As 5.1 The delivery of energy services are more effective when gender-aware. A lack of gender-aware policy-making is more likely to be of benefit to men.	(1) ENERGIA. 2019. Gender in the transition to sustainable energy for all: From evidence to inclusive policies (International Network on Gender & Energy)	1	1	As 5.1 The delivery of energy services are more effective when gender-aware. A lack of gender-aware policy-making is more likely to be of benefit to men.	(1) ENERGIA. 2019. Gender in the transition to sustainable energy for all: From evidence to inclusive policies (International Network on Gender & Energy)	1		Strengthen Enablers Overcome Inhibitors	Political Recognition Community Engagement	Political recognition of Kibera means consideration of informal settlements in national policy and decision-making and inclusion of the gender and energy needs of households Programmes to raise awareness to safe and efficient electricity use can be utilised as a educative platform for households.	Policy must be context-responsive, appropriatley implemented and monitored. Programmes to raise awareness must be context-reponsive and consider the fuel preferences and practices of households	(1) GNESD 2014. Country report (Kenya). Energy poverty in developing countries' urban poor communities: assessments and recommendations. Urban and Peri-urban energy access III. (2) ENERGIA. 2019. Gender in the transition to sustainable energy for all: From evidence to inclusive policies (International Network on Gender & Energy)	1		Strengthen Enablers Overcome Inhibitors	Political Recognition Strengthening Supply Chain Community Engagement	Consideration of informal settlements in national policy and decision-making and inclusion of the gender and energy needs of households Increase the number of LPG outlets and/or the establishment of local enterprises as distributors and dealers in Kibera means the creation of new jobs Programmes to raise awareness in the safe use and storage of LPG can be utilised as a educative platform to empow…	Policy must be context-responsive, appropriatley implemented and monitored. LPG outlets and local enterprises must be inclusive, empowering youth and gender	(1) Sesan. 2015. Scale Versus Substance? Lessons from a Context-Responsive Approach to Market-Based Stove Development in Western Kenya (Decentralized Solutions for Developing Economies) (2) GNESD 2014. Country report (Kenya). Energy poverty in developing countries' urban poor communities: assessments and recommendations. Urban and Peri-urban energy access III. (3) ENERGIA. 2019. Gender in the tra…
5.6	Ensure universal access to sexual and reproductive health and reproductive rights as agreed in accordance with the Programme of Action of the International Conference on Population and Development and the Beijing Platform for Action and the outcome documents of their review conferences
5.a	Undertake reforms to give women equal rights to economic resources, as well as access to ownership and control over land and other forms of property, financial services, inheritance and natural resources, in accordance with national laws	1		As 5.1		1		As 5.1		1		Strengthen Enablers	Political Recognition Financial Incentives	Political recognition of Kibera means consideration of informal settlements in national policy and decision-making and inclusion of the gender and energy needs of households. Direct Financial Incentives - subsidies, flexible paying - increases ability of women to pay for energy.	Policy must be context-responsive and gender aware, appropriatley implemented and monitored. Direct financial incentives must be implmeneted and monitored to ensure they reach targeted households and achieve policy goals.	(1) GNESD 2014. Country report (Kenya). Energy poverty in developing countries' urban poor communities: assessments and recommendations. Urban and Peri-urban energy access III. (2) ENERGIA. 2019. Gender in the transition to sustainable energy for all: From evidence to inclusive policies (International Network on Gender & Energy)	1		Strengthen Enablers	Political Recognition Strengthening Supply Chain Financial Incentives	Consideration of informal settlements in national policy and decision-making and inclusion of the gender and energy needs of households Increase the number of LPG outlets and/or the establishment of local enterprises as distributors and dealers in Kibera means the creation of new jobs Direct financial incentives - subsidies, removal of VAT, micro-finance - improves affordability of LPG for househ…	Policy must be context-responsive, appropriatley implemented and monitored. LPG outlets and local enterprises must be inclusive, empowering youth and gender. Direct financial incentives must be implmeneted and monitored to ensure they reach targeted households and achieve policy goals.	(1) Sesan. 2015. Scale Versus Substance? Lessons from a Context-Responsive Approach to Market-Based Stove Development in Western Kenya (Decentralized Solutions for Developing Economies) (2) GNESD 2014. Country report (Kenya). Energy poverty in developing countries' urban poor communities: assessments and recommendations. Urban and Peri-urban energy access III. (3) ENERGIA. 2019. Gender in the tra…
5.b	Enhance the use of enabling technology, in particular information and communications technology, to promote the empowerment of women	1		Electricity access allows for the use of ICT,	(1) Armey & Hosman. 2016. The centrality of electricity to ICT use in low-income countries. (Telecommunications Policy)	1		Information and communication technology can enable mobile payment methods that promote LPG access, such as Pay-As-You-Go.	(1) Envirofit. 2020. SmartGas (2) PayGo Energy. 2020. Transforming downstream LPG through digital innovation	1		Interlinkages Stand			Flexible paying require mobile payment methods. Financing innovations must be context-responsive, appropriatley implemented and monitored to ensure they reach targeted households.	(1) GNESD 2014. Country report (Kenya). Energy poverty in developing countries' urban poor communities: assessments and recommendations. Urban and Peri-urban energy access III. (2) ENERGIA. 2019. Gender in the transition to sustainable energy for all: From evidence to inclusive policies (International Network on Gender & Energy)	1		Strengthen Enablers	Community Engagement	Programmes to raise awareness in the safe use and storage of LPG can be utilised as a educative platform to empower women.	Pay-As-You-Go LPG initatives require mobile payment methods. Financing innovations must be context-responsive, appropriatley implemented and monitored to ensure they reach targeted households.	(1) Envirofit. 2020. SmartGas (2) PayGo Energy. 2020. Transforming downstream LPG through digital innovation (3) ENERGIA. 2019. Gender in the transition to sustainable energy for all: From evidence to inclusive policies (International Network on Gender & Energy)
5.c	Adopt and strengthen sound policies and enforceable legislation for the promotion of gender equality and the empowerment of all women and girls at all levels	1	1	As 5.1 and 5.5		1	1	Success of initiatives such as Kenya Petroleum Technical Assistance Project (KEPTAP) aiming to strengthen Kenyan petroleum supply chain and capacity measured against indicators that include gender aware policies. Context-responsive policies that are substantive, not symbolic, must empower women.	(1) World Bank. 2020. Kenya Petroleum Technical Assistance Project (KEPTAP) (World Bank) (2) Sesan. 2015. Scale Versus Substance? Lessons from a Context-Responsive Approach to Market-Based Stove Development in Western Kenya (Decentralized Solutions for Developing Economies)	1		Strengthens Enablers Overcome Inhibitors	Political Recognition Financial Incentives Community Engagement	Political recognition of Kibera means consideration of informal settlements in national policy and decision-making and inclusion of the gender and energy needs of households Direct Financial Incentives - subsidies, flexible paying - increases ability of women to pay for energy. Programmes to raise awareness to safe and efficient electricity use can be utilised as a educative platform for househol…	Policy must be context-responsive and gender aware, appropriatley implemented and monitored. Direct financial incentives must be implmeneted and monitored to ensure they reach targeted households and achieve policy goals. Programmes to raise awareness must be context-reponsive and consider the fuel preferences and practices of households	(1) GNESD 2014. Country report (Kenya). Energy poverty in developing countries' urban poor communities: assessments and recommendations. Urban and Peri-urban energy access III. (2) ENERGIA. 2019. Gender in the transition to sustainable energy for all: From evidence to inclusive policies (International Network on Gender & Energy) (3) Singh et al. 2015. Energy access realities in urban poor communi…	1		Overcome Inhibitors	Political Recognition Community Engagement	Consideration of informal settlements in national policy and decision-making and inclusion of the gender and energy needs of households Programmes to raise awareness in the safe use and storage of LPG can be utilised as a educative platform to empower women.	Policy must be context-responsive, appropriatley implemented and monitored.	(1) Singh et al. 2015. Energy access realities in urban poor communities of developing countries: assessments and recommendations (GNESD) (2) Kojima. 2011. The Role of Liquified Petroleum Gas in Reducing Energy Poverty (World Bank)
Goal 6. Ensure availability and sustainable management of water and sanitation for all
6.1	By 2030, achieve universal and equitable access to safe and affordable drinking water for all	1	1	Proven interlinkages between provision of energy and water services. Unaffordable energy can increase burden on household income limiting the ability to purchase water.	(1) Fuso Nerini et al. 2018. Mapping Synergies and trade-offs between Energy and the Sustainable Development Goals. (2) UN. Water and Energy | International Decade for Action ‘Water for Life’ 2005-2015. at <http://www.un.org/waterforlifedecade/water_and_energy.shtml> (3) Crow & Odaba. 2009. Scarce, costly and uncertain: water access in Kibera, Nairobi (Center for Global, International and Regiona…	1	1	LPG access allows for the boiling of water for sanitary purposes. Unaffordable energy can increase burden on household income limiting the ability to purchase water.	(1) Ritvik et al. 2011. Cost of domiciliary treatment of drinking water in selected slums in north India (Journal of Epidemiology & Community Health)	1		Strengthens Enabler Overcome Inhibitors	Financial Incentives Political recognition	Direct financial incentives - subsidies, lifeline tariffs - improves affordability of electricity for households. Political recognition of Kibera means consideration of informal settlements in national policy and decision-making	Direct financial incentives must be implmeneted and monitored to ensure they reach targeted households and achieve policy goals. Policy must be context-responsive and gender aware, appropriatley implemented and monitored.	(1) GNESD 2014. Country report (Kenya). Energy poverty in developing countries' urban poor communities: assessments and recommendations. Urban and Peri-urban energy access III. (2) The World Bank & ESMAP. 2015. Bringing global best practices to transform Kenya's slum electrification program	1		Overcome Inhibitors	Financial Incentives	Direct financial incentives - subsidies, removal of VAT, micro-finance - improves affordability of LPG for households.	Direct financial incentives must be implmeneted and monitored to ensure they reach targeted households and achieve policy goals.	(1) GNESD 2014. Country report (Kenya). Energy poverty in developing countries' urban poor communities: assessments and recommendations. Urban and Peri-urban energy access III. (2) Puzzolo et al. 2019. Supply considerations for scaling up clean cooking fuels for household energy in low‐ and middle‐income countries. (GeoHealth) (3) Kojima. 2011. The Role of Liquified Petroleum Gas in Reducing Ener…
6.2	By 2030, achieve access to adequate and equitable sanitation and hygiene for all and end open defecation, paying special attention to the needs of women and girls and those in vulnerable situations									1		Creates Enabler	Political Recognition	Political recognition of Kibera means consideration of informal settlements in national policy and decision-making	Policy must be context-responsive, appropriatley implemented and monitored.	(1) UN. Water and Energy | International Decade for Action ‘Water for Life’ 2005-2015. at <http://www.un.org/waterforlifedecade/water_and_energy.shtml> (2) Crow & Odaba. 2009. Scarce, costly and uncertain: water access in Kibera, Nairobi (Center for Global, International and Regional Studies)
6.3	By 2030, improve water quality by reducing pollution, eliminating dumping and minimizing release of hazardous chemicals and materials, halving the proportion of untreated wastewater and substantially increasing recycling and safe reuse globally	1	1	Electricity, as a substitute, removes risk of spillage from kerosene. Electricity generation through fossil-based sources contributes to water usage and water pollution.	(1) Karekezi et al. 2008. Energy Access for the Urban Poor (AFREPEN/FWD) (2) International Energy Agency. 2016. Energy and Air Pollution	1		LPG, as a substitute, removes risk of spillage from kerosene and will not pollute ground or acquifers if spilt.	(1) Gan & Van Leeuwen. 2019. Sustainable Development Goals the Contribution of LPG (Global LPG Partnership (GLPGP) and the World LPG Association (WLPGA))	1	1	Creates Enabler Limit inhibitor	Strengthening Supply Chain Community Engagement Financial Incentives	Introduction of Renewable Energy Sources in electricity generation reduces ambient air pollution. Raising awareness on safe and efficient use of electricity. Financial incentives that increase electricity consumption do not take source into account.	Financial incentives that encourage increased electricity consumption must be coupled with renewable energy sources in generation to limit inhibitor. Programmes to raise awareness must be context-reponsive and consider the fuel preferences and practices of households	(1) GNESD 2014. Country report (Kenya). Energy poverty in developing countries' urban poor communities: assessments and recommendations. Urban and Peri-urban energy access III. (2) The World Bank & ESMAP. 2018. Kenya National Electrification Strategy Key Highlights. (3) Whitley and van der Burg. 2015. Fossil Fuel Subsidy Reform in Sub-Saharan Africa: From Rhetoric to Reality. New Climate Economy,…	1		Strengthen Enablers	Community Engagement	Programmes to raise awareness educate households in the safe use and storage of LPG.	Programmes to raise awareness must be context-reponsive and consider the fuel preferences of households	(1) Kojima. 2011. The Role of Liquified Petroleum Gas in Reducing Energy Poverty (World Bank) (2) Puzzolo et al. 2019. Supply considerations for scaling up clean cooking fuels for household energy in low‐ and middle‐income countries. (GeoHealth) (3) GNESD 2014. Country report (Kenya). Energy poverty in developing countries' urban poor communities: assessments and recommendations. Urban and Peri-u…
6.4	By 2030, substantially increase water-use efficiency across all sectors and ensure sustainable withdrawals and supply of freshwater to address water scarcity and substantially reduce the number of people suffering from water scarcity	1	1	Proven interlinkage between energy and water.	(1) IEA. 2016. Water Energy Nexus: Excerpt from the World Energy Outlook. (International Energy Agency)					1	1	Interlinkage stand			Increased electricity consumption can affect water resources.	(1) IEA. 2016. Water Energy Nexus: Excerpt from the World Energy Outlook. (International Energy Agency)
6.5	By 2030, implement integrated water resources management at all levels, including through transboundary cooperation as appropriate	1	1	As 6.4 with special regards to hydro power in Kenya's power production.	(1) IEA. 2016. Water Energy Nexus: Excerpt from the World Energy Outlook. (International Energy Agency)					1	1	Interlinkage stand			Increased electricity consumption can affect water resources.	(1) IEA. 2016. Water Energy Nexus: Excerpt from the World Energy Outlook. (International Energy Agency)
6.6	By 2020, protect and restore water-related ecosystems, including mountains, forests, wetlands, rivers, aquifers and lakes	1	1	As 6.5						1	1	Interlinkage stand			Increased electricity consumption can affect water resources.	(1) IEA. 2016. Water Energy Nexus: Excerpt from the World Energy Outlook. (International Energy Agency)
6.a	By 2030, expand international cooperation and capacity-building support to developing countries in water- and sanitation-related activities and programmes, including water harvesting, desalination, water efficiency, wastewater treatment, recycling and reuse technologies
6.b	Support and strengthen the participation of local communities in improving water and sanitation management									1		Creates Enabler	Political Recognition	Political recognition and community engagement supports efficient programme design.	Policy must be context-responsive, appropriatley implemented and monitored.	(1) GNESD 2014. Country report (Kenya). Energy poverty in developing countries' urban poor communities: assessments and recommendations. Urban and Peri-urban energy access III. (2) The World Bank & ESMAP. 2015. Bringing global best practices to transform Kenya's slum electrification program
Goal 7. Ensure access to affordable, reliable, sustainable and modern energy for all
7.1	By 2030, ensure universal access to affordable, reliable and modern energy services	1	1	Electricity is a modern energy service. Unaffordable electricity may inhibit access.	(1) SE4All. 2016. Kenya Action Agenda (Government of Kenya) (2) GNESD 2014. Country report (Kenya). Energy poverty in developing countries' urban poor communities: assessments and recommendations. Urban and Peri-urban energy access III. (Global Network on Energy for Sustainable Development by The Energy, Environment and Development Network for Africa (AFREPREN/FWD))	1	1	LPG is a clean burning fuel, classified as a 'modern' energy service. Unaffordable LPG may inhibit access.	(1) Gan & Van Leeuwen. 2019. Sustainable Development Goals the Contribution of LPG (Global LPG Partnership (GLPGP) and the World LPG Association (WLPGA)) (2) Bhatia et al. 2015. Beyond Connections: Redefining Energy Access (World Bank) (3) Fuso Nerini et al. 2017. The cost of cooking a meal. The case of Nyeri County, Kenya (Environmental Research Letters) (4) GNESD 2014. Country report (Kenya). E…	1		Overcome Inhibitor	Political Recognition Financial Incentives Strengthening Supply Chain Community Engagement	Interventions developed to support universal, affordable and reliable energy access.	Policy must be context-responsive, appropriatley implemented and monitored. Direct financial incentives must be implmeneted and monitored to ensure they reach targeted households and achieve policy goals.	(1) GNESD 2014. Country report (Kenya). Energy poverty in developing countries' urban poor communities: assessments and recommendations. Urban and Peri-urban energy access III. (2) The World Bank & ESMAP. 2015. Bringing global best practices to transform Kenya's slum electrification program	1		Overcome Inhibitors	Financial Incentives	Direct financial incentives - subsidies, removal of VAT, micro-finance - improves affordability of LPG for households.	Direct financial incentives must be implmeneted and monitored to ensure they reach targeted households and achieve policy goals.	(1) GNESD 2014. Country report (Kenya). Energy poverty in developing countries' urban poor communities: assessments and recommendations. Urban and Peri-urban energy access III. (2) Puzzolo et al. 2019. Supply considerations for scaling up clean cooking fuels for household energy in low‐ and middle‐income countries. (GeoHealth) (3) Kojima. 2011. The Role of Liquified Petroleum Gas in Reducing Ener…
7.2	By 2030, increase substantially the share of renewable energy in the global energy mix	1	1	Grid electricity can be met through renewable or fosil-based energy sources.	(1) SE4All. 2016. Kenya Action Agenda (Government of Kenya)		1	LPG is a fossil fuel - a byproduct from natural gas and crude oil extraction and refinement - and therefore not a renewable energy source.	(1) Munro et al. 2017. Energy justice for all? Rethinking SDG 7 through struggles over traditional energy practices in Sierra Leone (Energy Policy)	1	1	Strengthen Enabler Limit inhibitor	Strengthening of Supply Chain Financial Incentives	Renewable energy sources in electricity generation. Financial direct incentives do not consider source of electricity generation.	Increased electricity consumption must be met by sustainable electricity supply from renewable energy resources.	(1) GNESD 2014. Country report (Kenya). Energy poverty in developing countries' urban poor communities: assessments and recommendations. Urban and Peri-urban energy access III. (2) The World Bank & ESMAP. 2018. Kenya National Electrification Strategy Key Highlights.		1	Interlinkages Stand			LPG is a fossil fuel - a byproduct from natural gas and crude oil extraction and refinement - and therefore it's sustainability is questionable
7.3	By 2030, double the global rate of improvement in energy efficiency	1		Legal and formal electricity access enables supply efficiency.	(1) GNESD 2014. Country report (Kenya). Energy poverty in developing countries' urban poor communities: assessments and recommendations. Urban and Peri-urban energy access III. (Global Network on Energy for Sustainable Development by The Energy, Environment and Development Network for Africa (AFREPREN/FWD))	1		LPG has a higher calorific value per unit than alternative fuels including biomass and coal	(1) Gan & Van Leeuwen. 2019. Sustainable Development Goals the Contribution of LPG (Global LPG Partnership (GLPGP) and the World LPG Association (WLPGA)) (2) Bhatia et al. 2015. Beyond Connections: Redefining Energy Access (World Bank)	1		Interlinkage Stand			Legal and formal electricity access enables supply efficiency.	(1) GNESD 2014. Country report (Kenya). Energy poverty in developing countries' urban poor communities: assessments and recommendations. Urban and Peri-urban energy access III.	1		Interlinkages Stand			LPG is a fossil fuel - a byproduct from natural gas and crude oil extraction and refinement - and therefore it's sustainability is questionable
7.a	By 2030, enhance international cooperation to facilitate access to clean energy research and technology, including renewable energy, energy efficiency and advanced and cleaner fossil-fuel technology, and promote investment in energy infrastructure and clean energy technology	1		International cooperation and financing initiatives support electrification programmes.	(1)The World Bank & ESMAP. 2015. Bringing global best practices to transform Kenya's slum electrification program	1	1	Cross-sectoral initiatives, private-public partnerships, NGOs programmes supported by Kenya's Ministry of Energy and Petroleum to strengthen LPG supply chain. Kenya has no domestic reserves of crude oil and is dependent on imports.	(1) SE4All. 2016. Kenya Action Agenda (Government of Kenya) (2) Kojima. 2011. The Role of Liquified Petroleum Gas in Reducing Energy Poverty (World Bank)	1		Interlinkage Stand			Cooperation and knowledge sharing on electrification programmes realised through existing initiatives, partnerships and programmes e.g. World Bank.	(1) The World Bank & ESMAP. 2015. Bringing global best practices to transform Kenya's slum electrification program	1	1	Limit Inhibitors	Strengthening Supply Chain	Domestic reserves of LPG improves supply security, stabilises prices, and enables import economy of scale but Kenya remains dependent on imports.	Cooperation and knowledge sharing above the locale of LPG supply chain and realised through existing initiatives, partnerships and programmes e.g. World Bank, GACC. Dependence on LPG imports ultimatley limits the energy sovereignty of Kenya.	(1) Kojima. 2011. The Role of Liquified Petroleum Gas in Reducing Energy Poverty (World Bank) (2) van den Berg. 2018. Kenya’s Strategy to Make Liquified Petroleum Gas the Nation’s Primary Cooking Fuel (World Bank) (3) Munro et al. 2017. Energy justice for all? Rethinking SDG 7 through struggles over traditional energy practices in Sierra Leone (Energy Policy) (4) Matthews 2014. Opportunities and …
7.b	By 2030, expand infrastructure and upgrade technology for supplying modern and sustainable energy services for all in developing countries, in particular least developed countries, small island developing States, and land-locked developing countries, in accordance with their respective programmes of support	1		Expanded infrastructure, as in transmission grids, enables electricity access.	(1) African Development Fund. 2014. Last Mile Connectivity Project (2) SE4All. 2016. Kenya Action Agenda (Government of Kenya)	1	1	As 7.a	(1) SE4All. 2016. Kenya Action Agenda (Government of Kenya) (2) van den Berg. 2018. Kenya’s Strategy to Make Liquified Petroleum Gas the Nation’s Primary Cooking Fuel (World Bank)	1		Strengthens Enabler	Strengthening of Supply Chain	Electricity access through expansion of distribution network grid.	Must include residents in informal settlements	(1) African Development Fund. 2014. Last Mile Connectivity Project (2) SE4All. 2016. Kenya Action Agenda (Government of Kenya)	1	1	Limit Inhibitors	Strengthening Supply Chain	Domestic reserves of LPG improves supply security, stabilises prices, and enables import economy of scale	Cooperation and knowledge sharing above the locale of LPG supply chain and realised through existing initiatives, partnerships and programmes e.g. World Bank, GACC. Dependence on LPG imports ultimatley limits the energy sovereignty of Kenya.	(1) Kojima. 2011. The Role of Liquified Petroleum Gas in Reducing Energy Poverty (World Bank) (2) van den Berg. 2018. Kenya’s Strategy to Make Liquified Petroleum Gas the Nation’s Primary Cooking Fuel (World Bank) (3) Munro et al. 2017. Energy justice for all? Rethinking SDG 7 through struggles over traditional energy practices in Sierra Leone (Energy Policy) (4) Matthews 2014. Opportunities and …
Goal 8. Promote sustained, inclusive and sustainable economic growth, full and productive employment and decent work for all
8.1	Sustain per capita economic growth in accordance with national circumstances and, in particular, at least 7 per cent gross domestic product growth per annum in the least developed countries	1		Electricity access enables productive employment. Electricity access enables SMEs growth and contribution to the formal economy, increasing turnover, profitability and employee level.	(1) Karekezi et al. Energy Access for the Urban Poor (AFREPEN/FWD 2008) (2) WIEGO. 2015. Myths & Facts about the Informal Economy and Workers in the Informal Economy (Women in Informal Employment Globalizing and Organizing)	1		LPG enables productive employment in SMEs and within the supply chain for the fuel. LPG access enables SMEs growth and contribution to the formal economy, increasing turnover, profitability and employee level.	(1) Gan & Van Leeuwen. 2019. Sustainable Development Goals the Contribution of LPG (Global LPG Partnership (GLPGP) and the World LPG Association (WLPGA)) (2) Kimemia and Annegarn. 2012. Productive Uses of Basic Energy and Fuel Transitions in Urban South Africa (Energy & Environement Research) (3) WIEGO. 2015. Myths & Facts about the Informal Economy and Workers in the Informal Economy (Women in I…	1		Strengthens Enabler	Strengthening Supply Chain Community Engagement	Expansion of distribution grid networks and community participation means improved availability of electricity and the creation of new jobs	Interventions must be inclusive of residents in informal settlements.	(1) GNESD 2014. Country report (Kenya). Energy poverty in developing countries' urban poor communities: assessments and recommendations. Urban and Peri-urban energy access III (2) The World Bank & ESMAP. 2015. Bringing global best practices to transform Kenya's slum electrification program.	1		Strengthen Enablers	Strengthening Supply Chain	Increase the number of LPG outlets and/or the establishment of local enterprises as distributors and dealers in Kibera means improved availability of LPG the creation of new jobs	Dependence on LPG imports ultimatley limits the energy sovereignty of Kenya.	(1) Sesan. 2015. Scale Versus Substance? Lessons from a Context-Responsive Approach to Market-Based Stove Development in Western Kenya (Decentralized Solutions for Developing Economies) (2) Kojima. 2011. The Role of Liquified Petroleum Gas in Reducing Energy Poverty (World Bank)
8.2	Achieve higher levels of economic productivity through diversification, technological upgrading and innovation, including through a focus on high-value added and labour-intensive sectors	1		As 8.1		1		As 8.1		1		Strengthens Enabler	Strengthening Supply Chain Community Engagement	Expansion of distribution grid networks and community participation means improved availability of electricity and the creation of new jobs	Interventions must be inclusive of residents in informal settlements.	(1) GNESD 2014. Country report (Kenya). Energy poverty in developing countries' urban poor communities: assessments and recommendations. Urban and Peri-urban energy access III (2) The World Bank & ESMAP. 2015. Bringing global best practices to transform Kenya's slum electrification program.	1		Strengthen Enablers	Strengthening Supply Chain	Increase the number of LPG outlets and/or the establishment of local enterprises as distributors and dealers in Kibera means improved availability of LPG the creation of new jobs	Dependence on LPG imports ultimatley limits the energy sovereignty of Kenya.	(1) Sesan. 2015. Scale Versus Substance? Lessons from a Context-Responsive Approach to Market-Based Stove Development in Western Kenya (Decentralized Solutions for Developing Economies) (2) Kojima. 2011. The Role of Liquified Petroleum Gas in Reducing Energy Poverty (World Bank)
8.3	Promote development-oriented policies that support productive activities, decent job creation, entrepreneurship, creativity and innovation, and encourage the formalization and growth of micro-, small- and medium-sized enterprises, including through access to financial services	1		As 8.1		1		As 8.1		1		Strengthens Enabler	Strengthening Supply Chain Community Engagement Political Recognition	Expansion of distribution grid networks and community engagement means improved availability of electricity and the creation of new jobs Political recognition of Kibera means consideration of informal settlements in national policy and decision-making encouraging SMEs.	Interventions must be inclusive of residents in informal settlements. Policy must be context-responsive, appropriatley implemented and monitored.	(1) GNESD 2014. Country report (Kenya). Energy poverty in developing countries' urban poor communities: assessments and recommendations. Urban and Peri-urban energy access III (2) The World Bank & ESMAP. 2015. Bringing global best practices to transform Kenya's slum electrification program.	1		Strengthen Enablers	Strengthening Supply Chain Political Recognition	Increase the number of LPG outlets and/or the establishment of local enterprises as distributors and dealers in Kibera means improved availability of LPG the creation of new jobs Consideration of informal settlements in national policy and decision-making can encourage the growth of SMEs.	Dependence on LPG imports ultimatley limits the energy sovereignty of Kenya. Policy must be context-responsive, appropriatley implemented and monitored.	(1) Sesan. 2015. Scale Versus Substance? Lessons from a Context-Responsive Approach to Market-Based Stove Development in Western Kenya (Decentralized Solutions for Developing Economies) (2) Kojima. 2011. The Role of Liquified Petroleum Gas in Reducing Energy Poverty (World Bank)
8.4	Improve progressively, through 2030, global resource efficiency in consumption and production and endeavour to decouple economic growth from environmental degradation, in accordance with the 10-year framework of programmes on sustainable consumption and production, with developed countries taking the lead	1		As 7.3		1		As 8.1. LPG has a higher calorific value per unit than alternative fuels	(1) Gan & Van Leeuwen. 2019. Sustainable Development Goals the Contribution of LPG (Global LPG Partnership (GLPGP) and the World LPG Association (WLPGA)) (2) Bhatia et al. 2015. Beyond Connections: Redefining Energy Access (World Bank)	1		Interlinkages Stand			Legal and formal electricity access enables supply efficiency.	(1) GNESD 2014. Country report (Kenya). Energy poverty in developing countries' urban poor communities: assessments and recommendations. Urban and Peri-urban energy access III.	1		Interlinkages Stand			Dependence on LPG imports ultimatley limits the energy sovereignty of Kenya.	(1) Sesan. 2015. Scale Versus Substance? Lessons from a Context-Responsive Approach to Market-Based Stove Development in Western Kenya (Decentralized Solutions for Developing Economies) (2) Kojima. 2011. The Role of Liquified Petroleum Gas in Reducing Energy Poverty (World Bank)
8.5	By 2030, achieve full and productive employment and decent work for all women and men, including for young people and persons with disabilities, and equal pay for work of equal value	1		As 8.1		1	1	As 8.1. LPG access reduces income for rural producers of biomass	(1) Gan & Van Leeuwen. 2019. Sustainable Development Goals the Contribution of LPG (Global LPG Partnership (GLPGP) and the World LPG Association (WLPGA)) (2) Munro et al. 2017. Energy justice for all? Rethinking SDG 7 through struggles over traditional energy practices in Sierra Leone (Energy Policy)	1		Strengthens Enabler	Strengthening Supply Chain Community Engagement	Expansion of distribution grid networks and community engagement means improved availability of electricity and the creation of new jobs	Interventions must be inclusive of residents in informal settlements.	(1) GNESD 2014. Country report (Kenya). Energy poverty in developing countries' urban poor communities: assessments and recommendations. Urban and Peri-urban energy access III (2) The World Bank & ESMAP. 2015. Bringing global best practices to transform Kenya's slum electrification program.	1	1	Strengthen Enablers	Strengthening Supply Chain	Increase the number of LPG outlets and/or the establishment of local enterprises as distributors and dealers in Kibera means improved availability of LPG the creation of new jobs	Increasing access of LPG will have an impact on the incomes of rural producers of charcoal	(1) Sesan. 2015. Scale Versus Substance? Lessons from a Context-Responsive Approach to Market-Based Stove Development in Western Kenya (Decentralized Solutions for Developing Economies) (2) Kojima. 2011. The Role of Liquified Petroleum Gas in Reducing Energy Poverty (World Bank)
8.6	By 2020, substantially reduce the proportion of youth not in employment, education or training	1		As 8.1 and 4.3		1		As 8.1 and 4.3		1		Strengthens Enabler	Strengthening Supply Chain Community Engagement	Expansion of distribution grid networks and community engagement means improved availability of electricity and the creation of new jobs	Interventions must be inclusive of residents in informal settlements.	(1) GNESD 2014. Country report (Kenya). Energy poverty in developing countries' urban poor communities: assessments and recommendations. Urban and Peri-urban energy access III (2) The World Bank & ESMAP. 2015. Bringing global best practices to transform Kenya's slum electrification program.	1		Strengthen Enablers	Strengthening Supply Chain	Increase the number of LPG outlets and/or the establishment of local enterprises as distributors and dealers in Kibera means improved availability of LPG the creation of new jobs	Increase the number of LPG outlets and/or the establishment of local enterprises as distributors and dealers in Kibera means improved availability of LPG the creation of new jobs	(1) Sesan. 2015. Scale Versus Substance? Lessons from a Context-Responsive Approach to Market-Based Stove Development in Western Kenya (Decentralized Solutions for Developing Economies) (2) Kojima. 2011. The Role of Liquified Petroleum Gas in Reducing Energy Poverty (World Bank)
8.7	Take immediate and effective measures to eradicate forced labour, end modern slavery and human trafficking and secure the prohibition and elimination of the worst forms of child labour, including recruitment and use of child soldiers, and by 2025 end child labour in all its forms
8.8	Protect labour rights and promote safe and secure working environments for all workers, including migrant workers, in particular women migrants, and those in precarious employment	1	1	Formalisation of electricity supply can protect labour rights and promote safe and secure working environments, empower otherwise marginalised groups socio-economically. Prevalence of illegal connections create hostile and unsafe working environments for utility workers.	(1) Karekezi et al. Energy Access for the Urban Poor (AFREPEN/FWD 2008) (2) World Bank. 2015. Bringing global best practices to transform Kenya's slum electrification program.	1		LPG access can promote safe and secure working environments, reducing IAP, and empower otherwise marginalised groups socio-economically.	(1) Gan & Van Leeuwen. 2019. Sustainable Development Goals the Contribution of LPG (Global LPG Partnership (GLPGP) and the World LPG Association (WLPGA)) (2) Karekezi et al. 2008. Energy Access for the Urban Poor (AFREPEN/FWD)	1		Strengthens Enabler Overcome Inhibitor	Strengthening Supply Chain Community Engagement	Expansion of distribution grid networks and community engagement means improved availability of electricity, the creation of new jobs, trust building and consensus. .	Interventions must be inclusive of residents in informal settlements.	(1) GNESD 2014. Country report (Kenya). Energy poverty in developing countries' urban poor communities: assessments and recommendations. Urban and Peri-urban energy access III (2) The World Bank & ESMAP. 2015. Bringing global best practices to transform Kenya's slum electrification program.	1		Strengthen Enablers	Strengthening Supply Chain Political Recognition	Domestic reserves of LPG improves supply security, stabilises prices, and enables import economy of scale. Standardise LPG cylinders and appliances and enforcement of national standards, laws, regulations and monitoring mechanisms reduces safety risk of LPG. Consideration of informal settlements in national policy, protecting labour rights.	Dependence on LPG imports ultimatley limits the energy sovereignty of Kenya. Policy must be context-responsive, appropriatley implemented and monitored.	(1) Kojima. 2011. The Role of Liquified Petroleum Gas in Reducing Energy Poverty (World Bank) (2) van den Berg. 2018. Kenya’s Strategy to Make Liquified Petroleum Gas the Nation’s Primary Cooking Fuel (World Bank) (3) Munro et al. 2017. Energy justice for all? Rethinking SDG 7 through struggles over traditional energy practices in Sierra Leone (Energy Policy) (4) Matthews 2014. Opportunities and …
8.9	By 2030, devise and implement policies to promote sustainable tourism that creates jobs and promotes local culture and products	1		Electricity access enables productive employment in SMEs providing tourism services	(1) Chege and Mwisukha. 2013. Benefits of slum tourism in Kibera slum in Nairobil, Kenya (International Journal of Arts and Commerce)	1		LPG enables productive employment in SMEs providing tourism services	(1) Chege and Mwisukha. 2013. Benefits of slum tourism in Kibera slum in Nairobil, Kenya (International Journal of Arts and Commerce) (2) Gan & Van Leeuwen. 2019. Sustainable Development Goals the Contribution of LPG (Global LPG Partnership (GLPGP) and the World LPG Association (WLPGA)) (3) Kimemia and Annegarn. 2012. Productive Uses of Basic Energy and Fuel Transitions in Urban South Africa (Ene…	1		Interlinkages Stand			Electricity access enables productive employment in SMEs providing tourism services	(1) Chege and Mwisukha. 2013. Benefits of slum tourism in Kibera slum in Nairobil, Kenya (International Journal of Arts and Commerce)	1		Interlinkages Stand			Dependence on LPG imports ultimatley limits the energy sovereignty of Kenya. Policy must be context-responsive, appropriatley implemented and monitored.	(1) Kojima. 2011. The Role of Liquified Petroleum Gas in Reducing Energy Poverty (World Bank) (2) van den Berg. 2018. Kenya’s Strategy to Make Liquified Petroleum Gas the Nation’s Primary Cooking Fuel (World Bank) (3) Munro et al. 2017. Energy justice for all? Rethinking SDG 7 through struggles over traditional energy practices in Sierra Leone (Energy Policy) (4) Matthews 2014. Opportunities and …
8.1	Strengthen the capacity of domestic financial institutions to encourage and expand access to banking, insurance and financial services for all	1		Electricity access iniatiatives require mobile payment methods	(1) Sanyal et al. 2016. Stimulating Pay-As-You-Go Energy Access in Kenya and Tanzania: The Role of Development Finance (World Resource Institution)	1		Information and communication technology can enable mobile payment methods that promote LPG access such as Pay-As-You-Go.	(1) Envirofit. 2020. SmartGas (2) PayGo Energy. 2020. Transforming downstream LPG through digital innovation	1		Interlinkages Stand			Electricity access iniatiatives require mobile payment methods	(1) Sanyal et al. 2016. Stimulating Pay-As-You-Go Energy Access in Kenya and Tanzania: The Role of Development Finance (World Resource Institution)	1		Strengthen Enablers	Financial Incentives	Direct financial incentives - subsidies, removal of VAT, micro-finance - improves affordability of LPG for households.	Pay-As-You-Go LPG initatives require mobile payment methods. Financing innovations must be context-responsive, appropriatley implemented and monitored to ensure they reach targeted households.	(1) Envirofit. 2020. SmartGas (2) PayGo Energy. 2020. Transforming downstream LPG through digital innovation (3) ENERGIA. 2019. Gender in the transition to sustainable energy for all: From evidence to inclusive policies (International Network on Gender & Energy)
8.a	Increase Aid for Trade support for developing countries, in particular least developed countries, including through the Enhanced Integrated Framework for Trade-Related Technical Assistance to Least Developed Countries	1		Evidence that Aid for Trade can include improving energy and electricity infrastructure.	(1) PricewaterhouseCoopers and Hamburg Institute of International Economics. 2009. Aid for Trade: making trade effective for development: Case studies from Kenya, Tanzania and Uganda.	1		Evidence that Aid for Trade can include improving energy infrastructure.	(1) Gan & Van Leeuwen. 2019. Sustainable Development Goals the Contribution of LPG (Global LPG Partnership (GLPGP) and the World LPG Association (WLPGA)) (2) van den Berg. 2018. Kenya’s Strategy to Make Liquified Petroleum Gas the Nation’s Primary Cooking Fuel (World Bank) (3) PricewaterhouseCoopers and Hamburg Institute of International Economics. 2009. Aid for Trade: making trade effective for …	1		Strengthens Enabler	Strengthening Supply Chain	Expansion of grid distribution networks mean improving energy and electricity infrastructure.	Interventions must be inclusive of residents in informal settlements.	(2) The World Bank & ESMAP. 2015. Bringing global best practices to transform Kenya's slum electrification program.	1		Strengthen Enablers	Strengthening Supply Chain	Domestic reserves of LPG improves supply security, stabilises prices, and enables import economy of scale.	Dependence on LPG imports ultimatley limits the energy sovereignty of Kenya.	(1) Kojima. 2011. The Role of Liquified Petroleum Gas in Reducing Energy Poverty (World Bank) (2) van den Berg. 2018. Kenya’s Strategy to Make Liquified Petroleum Gas the Nation’s Primary Cooking Fuel (World Bank) (3) Munro et al. 2017. Energy justice for all? Rethinking SDG 7 through struggles over traditional energy practices in Sierra Leone (Energy Policy) (4) Matthews 2014. Opportunities and …
8.b	By 2020, develop and operationalize a global strategy for youth employment and implement the Global Jobs Pact of the International Labour Organization									1		Creates Enabler	Community Engagement Strengthening Supply Chain Political Recognition	Community engagement enables youth employment. Consideration of informal settlements in national policy and decision-making and inclusion of the youth and energy needs of households.	Interventions must be inclusive of residents in informal settlements.	(1) GNESD 2014. Country report (Kenya). Energy poverty in developing countries' urban poor communities: assessments and recommendations. Urban and Peri-urban energy access III (2) The World Bank & ESMAP. 2015. Bringing global best practices to transform Kenya's slum electrification program. (3) de Bercegol & Monstadt. 2018.The Kenya Slum Electrification Program. Local politics of electricity netw…	1		Create Enabler	Political Recognition Strengthen Supply Chain	Consideration of informal settlements in national policy and decision-making and inclusion of the youth and energy needs of households. Increase the number of LPG outlets and/or the establishment of local enterprises as distributors and dealers in Kibera means improved availability of LPG the creation of new jobs	Programmes to raise awareness must be context-reponsive and consider the fuel preferences of households	(1) Kojima. 2011. The Role of Liquified Petroleum Gas in Reducing Energy Poverty (World Bank) (2) GNESD 2014. Country report (Kenya). Energy poverty in developing countries' urban poor communities: assessments and recommendations. Urban and Peri-urban energy access III.
Goal 9. Build resilient infrastructure, promote inclusive and sustainable industrialization and foster innovation
9.1	Develop quality, reliable, sustainable and resilient infrastructure, including regional and transborder infrastructure, to support economic development and human well-being, with a focus on affordable and equitable access for all	1		Reliable, sustainable, resilient infrastructure enables electricity access through grid expansion.	(1) African Development Fund. Last Mile Connectivity Project (2014) (2) SE4All. 2016. Kenya Action Agenda (Government of Kenya)	1		Reliable, sustainable, resilient infrastructure enables LPG access.	(1) World Bank. 2020. Kenya Petroleum Technical Assistance Project (KEPTAP) (World Bank) (2) Gan & Van Leeuwen. 2019. Sustainable Development Goals the Contribution of LPG (Global LPG Partnership (GLPGP) and the World LPG Association (WLPGA)) (3) van den Berg. 2018. Kenya’s Strategy to Make Liquified Petroleum Gas the Nation’s Primary Cooking Fuel (World Bank)	1		Strengthen Enablers	Strengthening Supply Chain	Expansion of grid distribution networks mean improving energy and electricity infrastructure.	Interventions must be inclusive of residents in informal settlements.	(1) African Development Fund. Last Mile Connectivity Project (2014) (2) SE4All. 2016. Kenya Action Agenda (Government of Kenya)	1		Strengthen Enablers	Strengthening Supply Chain	Domestic reserves of LPG improves supply security, stabilises prices, and enables import economy of scale.	Dependence on LPG imports ultimatley limits the energy sovereignty of Kenya. LPG access will be achieved through strengthening Kenya's petroleum supply chain and associated infrastructure i.e. import, bulk storage, transportation and filling facilities.	(1) Kojima. 2011. The Role of Liquified Petroleum Gas in Reducing Energy Poverty (World Bank) (2) van den Berg. 2018. Kenya’s Strategy to Make Liquified Petroleum Gas the Nation’s Primary Cooking Fuel (World Bank) (3) Munro et al. 2017. Energy justice for all? Rethinking SDG 7 through struggles over traditional energy practices in Sierra Leone (Energy Policy) (4) Matthews 2014. Opportunities and …
9.2	Promote inclusive and sustainable industrialization and, by 2030, significantly raise industry’s share of employment and gross domestic product, in line with national circumstances, and double its share in least developed countries									1		Creates Enabler	Strengthening Supply Chain	Expansion of grid distribution networks mean improving energy and electricity infrastructure.	Interventions must be inclusive of residents in informal settlements.	(1) African Development Fund. Last Mile Connectivity Project (2014) (2) SE4All. 2016. Kenya Action Agenda (Government of Kenya)	1		Create Enabler	Strengthening Supply Chain	Domestic reserves of LPG improves supply security, stabilises prices, and enables import economy of scale allowing for increased industrial use	Dependence on LPG imports ultimatley limits the energy sovereignty of Kenya.	(1) Kojima. 2011. The Role of Liquified Petroleum Gas in Reducing Energy Poverty (World Bank) (2) van den Berg. 2018. Kenya’s Strategy to Make Liquified Petroleum Gas the Nation’s Primary Cooking Fuel (World Bank) (3) Munro et al. 2017. Energy justice for all? Rethinking SDG 7 through struggles over traditional energy practices in Sierra Leone (Energy Policy) (4) Matthews 2014. Opportunities and …
9.3	Increase the access of small-scale industrial and other enterprises, in particular in developing countries, to financial services, including affordable credit, and their integration into value chains and markets	1		As 8.1 and 8.10		1		As 8.1 and 8.10		1		Strengthen Enablers	Political Recognition	Political recognition of Kibera means consideration of informal settlements in national policy and decision-making encouraging SMEs.	Policy must be context-responsive, appropriatley implemented and monitored.	(1) Singh et al. 2015. Energy access realities in urban poor communities of developing countries: assessments and recommendations (GNESD)	1		Strengthen Enablers	Financial Incentives	Direct financial incentives - subsidies, removal of VAT, micro-finance - improves affordability of LPG for households.	Direct financial incentives must be implmeneted and monitored to ensure they reach targeted households and achieve policy goals.	(1) Singh et al. 2015. Energy access realities in urban poor communities of developing countries: assessments and recommendations (GNESD) (2) Puzzolo et al. 2019. Supply considerations for scaling up clean cooking fuels for household energy in low‐ and middle‐income countries (GeoHealth)
9.4	By 2030, upgrade infrastructure and retrofit industries to make them sustainable, with increased resource-use efficiency and greater adoption of clean and environmentally sound technologies and industrial processes, with all countries taking action in accordance with their respective capabilities					1		As 9.1 LPG is a clean burning fuel, classified as a 'modern' energy service and has a higher calorific value per unit than alternative fuels	(1) Gan & Van Leeuwen. 2019. Sustainable Development Goals the Contribution of LPG (Global LPG Partnership (GLPGP) and the World LPG Association (WLPGA)) (2) Bhatia et al. 2015. Beyond Connections: Redefining Energy Access (World Bank)								1		Interlinkages Stand			LPG is a fossil fuel - a byproduct from natural gas and crude oil extraction and refinement - and therefore it's sustainability is questionable
9.5	Enhance scientific research, upgrade the technological capabilities of industrial sectors in all countries, in particular developing countries, including, by 2030, encouraging innovation and substantially increasing the number of research and development workers per 1 million people and public and private research and development spending	1		As 9.1. Electricity access iniatiatives require capacitiy building.	(1) IEA and the World Bank. 2015. Progress toward sustainable energy 2015. (International Energy Agency and the World Bank)	1		As 9.1	(1) van den Berg. 2018. Kenya’s Strategy to Make Liquified Petroleum Gas the Nation’s Primary Cooking Fuel (World Bank)	1		Interlinkage stand			Electricity access iniatiatives require capacitiy building, which can include Renewable energy technologies.	(1) IEA and the World Bank. 2015. Progress toward sustainable energy 2015. (International Energy Agency and the World Bank)	1		Interlinkages Stand			Domestic reserves of LPG improves supply security, stabilises prices, and enables import economy of scale. Dependence on LPG imports ultimatley limits the energy sovereignty of Kenya.
9.a	Facilitate sustainable and resilient infrastructure development in developing countries through enhanced financial, technological and technical support to African countries, least developed countries, landlocked developing countries and small island developing States	1		Cross-sectoral initiatives, private-public partnerships, NGOs programmes promote electricity access.	(1) African Development Fund. Last Mile Connectivity Project (2014) (2) SE4All. 2016. Kenya Action Agenda (Government of Kenya)	1		Cross-sectoral initiatives, private-public partnerships, NGOs programmes promote LPG access	(1) SE4All. 2016. Kenya Action Agenda (Government of Kenya)	1		Interlinkage stand			Cross-sectoral initiatives, private-public partnerships, NGOs programmes promote electricity access.	(1) African Development Fund. Last Mile Connectivity Project (2014) (2) SE4All. 2016. Kenya Action Agenda (Government of Kenya)	1		Interlinkages Stand			Cooperation and knowledge sharing above the locale of LPG supply chain and realised through existing initiatives, partnerships and programmes e.g. World Bank, GACC.	(1) GNESD 2014. Country report (Kenya). Energy poverty in developing countries' urban poor communities: assessments and recommendations. Urban and Peri-urban energy access III.
9.b	Support domestic technology development, research and innovation in developing countries, including by ensuring a conducive policy environment for, inter alia, industrial diversification and value addition to commodities
9.c	Significantly increase access to information and communications technology and strive to provide universal and affordable access to the Internet in least developed countries by 2020	1		As 8.10		1		As 8.10		1		Strengthen Enabler	Financial Incentives	Financial Direct Intencitives - subsidies, lifeline tariffs, flexible paying - increases households' affordability opportunities and requires mobile payment methods.	Financing innovations must be context-responsive, appropriatley implemented and monitored to ensure they reach targeted households.	(1) The World Bank & ESMAP. 2015. Bringing global best practices to transform Kenya's slum electrification program (2) African Development Fund. Last Mile Connectivity Project (2014)	1		Interlinkages Stand			Pay-As-You-Go LPG initatives require mobile payment methods. Financing innovations must be context-responsive, appropriatley implemented and monitored to ensure they reach targeted households.	(1) Envirofit. 2020. SmartGas (2) PayGo Energy. 2020. Transforming downstream LPG through digital innovation (3) ENERGIA. 2019. Gender in the transition to sustainable energy for all: From evidence to inclusive policies (International Network on Gender & Energy)
Goal 10. Reduce inequality within and among countries
10.1	By 2030, progressively achieve and sustain income growth of the bottom 40 per cent of the population at a rate higher than the national average	1		Electricity enables productive employment in SMEs and within the electricity supply chain in rural and urban areas	(1) Karekezi et al. Energy Access for the Urban Poor (AFREPEN/FWD 2008) (2) World Bank. 2015. Bringing global best practices to transform Kenya's slum electrification program.	1	1	LPG enables productive employment in SMEs and within the supply chain for the fuel. LPG is a fossil fuel - a byproduct from natural gas and crude oil extraction and refinement - and therefore it's sustainability is questionable	(1) Gan & Van Leeuwen. 2019. Sustainable Development Goals the Contribution of LPG (Global LPG Partnership (GLPGP) and the World LPG Association (WLPGA)) (2) Munro et al. 2017. Energy justice for all? Rethinking SDG 7 through struggles over traditional energy practices in Sierra Leone (Energy Policy)	1		Strengthen Enabler	Strengthening Supply Chain Community Engagement	Expansion of distribution grid networks and community participation means improved availability of electricity and the creation of new jobs	Interventions must be inclusive of residents in informal settlements.	(1) GNESD 2014. Country report (Kenya). Energy poverty in developing countries' urban poor communities: assessments and recommendations. Urban and Peri-urban energy access III (2) The World Bank & ESMAP. 2015. Bringing global best practices to transform Kenya's slum electrification program.	1	1	Strengthen Enablers	Strengthening Supply Chain	Increase the number of LPG outlets and/or the establishment of local enterprises as distributors and dealers in Kibera means improved availability of LPG the creation of new jobs	Dependence on LPG imports ultimatley limits the energy sovereignty of Kenya. LPG is a fossil fuel - a byproduct from natural gas and crude oil extraction and refinement - and therefore it's sustainability is questionable	(1) Kojima. 2011. The Role of Liquified Petroleum Gas in Reducing Energy Poverty (World Bank) (2) van den Berg. 2018. Kenya’s Strategy to Make Liquified Petroleum Gas the Nation’s Primary Cooking Fuel (World Bank) (3) Munro et al. 2017. Energy justice for all? Rethinking SDG 7 through struggles over traditional energy practices in Sierra Leone (Energy Policy) (4) Matthews 2014. Opportunities and …
10.2	By 2030, empower and promote the social, economic and political inclusion of all, irrespective of age, sex, disability, race, ethnicity, origin, religion or economic or other status	1	1	Electricity access can empower other wise marginalised groups socio-economically, provided provision of access is context-responsive.	(1) UNDP. 2011. Towards an ‘Energy Plus’ Approach For The Poor. A review of good practices and lessons learned from Asia and the Pacific (2) ENERGIA. 2019. Gender in the transition to sustainable energy for all: From evidence to inclusive policies	1	1	LPG access can empower other wise marginalised groups socio-economically, provided provision of access is contaxt-responsive.	(1) UNDP. 2011. Towards an ‘Energy Plus’ Approach For The Poor. A review of good practices and lessons learned from Asia and the Pacific (United Nations Development Programme) (2) Sesan. 2015. Scale Versus Substance? Lessons from a Context-Responsive Approach to Market-Based Stove Development in Western Kenya (Decentralized Solutions for Developing Economies) (3) ENERGIA. 2019. Gender in the tran…	1		Strengthen Enabler Overcome Inhibitors	Strengthening Supply Chain Community Engagement Political Recognition	Political recognition of Kibera means consideration of informal settlements in national policy and decision-making and inclusion of the energy needs of households. Expansion of distribution grid networks and community engagement can lead to the creation of new jobs. Programmes to raise awareness educate households in the safe and efficient use of electricity.	Policy must be context-responsive, appropriatley implemented and monitored. Interventions must be inclusive of residents in informal settlements. Programmes to raise awareness must be context-reponsive and consider the fuel preferences and practices of households.	(1) GNESD 2014. Country report (Kenya). Energy poverty in developing countries' urban poor communities: assessments and recommendations. Urban and Peri-urban energy access III (2) The World Bank & ESMAP. 2015. Bringing global best practices to transform Kenya's slum electrification program.	1		Strengthen Enablers Overcome Inhibitors	Strengthening Supply Chain Political Recognition Community Engagement	Consideration of informal settlements in national policy and decision-making and inclusion of the energy needs of households. Increase the number of LPG outlets and/or the establishment of local enterprises as distributors and dealers in Kibera means improved availability of LPG the creation of new jobs. Programmes to raise awareness educate households in the safe use and storage of LPG.	Policy must be context-responsive, appropriatley implemented and monitored. Programmes to raise awareness must be context-reponsive and consider the fuel preferences of households.	(1) Kojima. 2011. The Role of Liquified Petroleum Gas in Reducing Energy Poverty (World Bank) (2) Puzzolo et al. 2019. Supply considerations for scaling up clean cooking fuels for household energy in low‐ and middle‐income countries. (GeoHealth) (3) GNESD 2014. Country report (Kenya). Energy poverty in developing countries' urban poor communities: assessments and recommendations. Urban and Peri-u…
10.3	Ensure equal opportunity and reduce inequalities of outcome, including by eliminating discriminatory laws, policies and practices and promoting appropriate legislation, policies and action in this regard	1	1	As 10.2		1	1	As 10.2		1		Strengthen Enabler Overcome Inhibitors	Strengthening Supply Chain Community Engagement Political Recognition	Political recognition of Kibera means consideration of informal settlements in national policy and decision-making and inclusion of the energy needs of households. Expansion of distribution grid networks and community participation can lead to the creation of new jobs. Programmes to raise awareness educate households in the safe and efficient use of electricity.	Policy must be context-responsive, appropriatley implemented and monitored. Interventions must be inclusive of residents in informal settlements. Programmes to raise awareness must be context-reponsive and consider the fuel preferences and practices of households.	(1) GNESD 2014. Country report (Kenya). Energy poverty in developing countries' urban poor communities: assessments and recommendations. Urban and Peri-urban energy access III (2) The World Bank & ESMAP. 2015. Bringing global best practices to transform Kenya's slum electrification program.	1		Strengthen Enablers Overcome Inhibitors	Strengthening Supply Chain Political Recognition	Consideration of informal settlements in national policy and decision-making and inclusion of the energy needs of households. Increase the number of LPG outlets and/or the establishment of local enterprises as distributors and dealers in Kibera means improved availability of LPG the creation of new jobs.	Policy must be context-responsive, appropriatley implemented and monitored.	(1) Kojima. 2011. The Role of Liquified Petroleum Gas in Reducing Energy Poverty (World Bank) (2) Puzzolo et al. 2019. Supply considerations for scaling up clean cooking fuels for household energy in low‐ and middle‐income countries. (GeoHealth) (3) GNESD 2014. Country report (Kenya). Energy poverty in developing countries' urban poor communities: assessments and recommendations. Urban and Peri-u…
10.4	Adopt policies, especially fiscal, wage and social protection policies, and progressively achieve greater equality	1	1	As 10.2		1	1	As 10.2		1		Strengthen Enabler Overcome Inhibitors	Political Recognition	Political recognition of Kibera means consideration of informal settlements in national policy and decision-making and inclusion of the energy needs of households.	Policy must be context-responsive, appropriatley implemented and monitored.	(1) GNESD 2014. Country report (Kenya). Energy poverty in developing countries' urban poor communities: assessments and recommendations. Urban and Peri-urban energy access III (2) The World Bank & ESMAP. 2015. Bringing global best practices to transform Kenya's slum electrification program.	1		Strengthen Enablers Overcome Inhibitors	Political Recognition	Consideration of informal settlements in national policy and decision-making and inclusion of the energy needs of households.	Policy must be context-responsive, appropriatley implemented and monitored.	(1) Kojima. 2011. The Role of Liquified Petroleum Gas in Reducing Energy Poverty (World Bank) (2) Puzzolo et al. 2019. Supply considerations for scaling up clean cooking fuels for household energy in low‐ and middle‐income countries. (GeoHealth) (3) GNESD 2014. Country report (Kenya). Energy poverty in developing countries' urban poor communities: assessments and recommendations. Urban and Peri-u…
10.5	Improve the regulation and monitoring of global financial markets and institutions and strengthen the implementation of such regulations
10.6	Ensure enhanced representation and voice for developing countries in decision-making in global international economic and financial institutions in order to deliver more effective, credible, accountable and legitimate institutions
10.7	Facilitate orderly, safe, regular and responsible migration and mobility of people, including through the implementation of planned and well-managed migration policies		1	New energy infrastructures can cause displacement of communitites.	(1) African Development Fund. Last Mile Connectivity Project (2014)						1	Interlinkage Stands			New energy infrastructures can cause displacement of communitites.	(1) McDonald-Wilmsen & Webber. 2010. Dams and displacement: raising the standards and broadening the research agenda. (2) Kenya Power. 2019. Kenya Electricity System Improvement Project Resettlement Policy Framework (3) African Development Fund. 2014. Last Mile Connectivity Project.
10.a	Implement the principle of special and differential treatment for developing countries, in particular least developed countries, in accordance with World Trade Organization agreements
10.b	Encourage official development assistance and financial flows, including foreign direct investment, to States where the need is greatest, in particular least developed countries, African countries, small island developing States and landlocked developing countries, in accordance with their national plans and programmes	1		Cross-sectoral initiatives, private-public partnerships, NGOs programmes promote the access to electricity.	(1) SE4All. 2016. Kenya Action Agenda (Government of Kenya)	1		Cross-sectoral initiatives, private-public partnerships, NGOs programmes promote the access to LPG	(1) SE4All. 2016. Kenya Action Agenda (Government of Kenya)	1		Interlinkage Stands			Cross-sectoral initiatives, private-public partnerships, NGOs programmes promote the access to electricity.	(1) SE4All. 2016. Kenya Action Agenda (Government of Kenya)	1		Interlinkages Stand			Mobilisation of direct financial incentives and investment in LPG infrastructure realised through existing initiatives, partnerships and programmes e.g. World Bank, GACC.	(1) SE4All. 2016. Kenya Action Agenda (Government of Kenya) (2) Singh et al. 2014. Energy Access Realities in Urban Poor Communities of Developing Countries: Assessments and Recommendations (Global Network on Energy for Sustainable Development)
10.c	By 2030, reduce to less than 3 per cent the transaction costs of migrant remittances and eliminate remittance corridors with costs higher than 5 per cent
Goal 11. Make cities and human settlements inclusive, safe, resilient and sustainable
11.1	By 2030, ensure access for all to adequate, safe and affordable housing and basic services and upgrade slums	1	1	Legal electricity access supports basic services and reduces risk of electrocution, fires caused by faulty electrics and can be included in slum upgrading programs. unaffordable energy can increase burden on household income limiting access to basic services.	(1) GNESD 2014. Country report (Kenya). Energy poverty in developing countries' urban poor communities: assessments and recommendations. Urban and Peri-urban energy access III (2) The World Bank & ESMAP. 2015. Bringing global best practices to transform Kenya's slum electrification program.	1	1	LPG, as a substitute for biomass, reduces IAP and associated physical hazards. Unaffordable energy can increase burden on household income limiting access to basic services.	(1) GNESD 2014. Country report (South Africa). Energy poverty in developing countries' urban poor communities: assessments and recommendations. Urban and Peri-urban energy access III. (Global Network on Energy for Sustainable Development by Energy Research Centre, University of Cape Town) (2) Sverdlik. 2011. Ill-health and poverty: a literature review on health in informal settlements (Internatio…	1		Strengthen Enabler Overcome Inhibitors	Political Recognition Financial Incentives	Political recognition of Kibera means consideration of informal settlements in national policy and decision-making and inclusion of the needs of households. Financial direct incentives - subsidies, lifeline tariffs, flexible paying - improves affordability of electricity for households.	Policy must be context-responsive, appropriatley implemented and monitored. Direct financial incentives must be implmeneted and monitored to ensure they reach targeted households and achieve policy goals.	(1) GNESD 2014. Country report (Kenya). Energy poverty in developing countries' urban poor communities: assessments and recommendations. Urban and Peri-urban energy access III (2) The World Bank & ESMAP. 2015. Bringing global best practices to transform Kenya's slum electrification program.	1		Strengthen Enabler Overcome Inhibitors	Financial Incentives	Direct financial incentives - subsidies, removal of VAT, micro-finance - improves affordability of LPG for households.	Direct financial incentives must be implmeneted and monitored to ensure they reach targeted households and achieve policy goals.	(1) GNESD 2014. Country report (Kenya). Energy poverty in developing countries' urban poor communities: assessments and recommendations. Urban and Peri-urban energy access III. (2) Puzzolo et al. 2019. Supply considerations for scaling up clean cooking fuels for household energy in low‐ and middle‐income countries. (GeoHealth) (3) Kojima. 2011. The Role of Liquified Petroleum Gas in Reducing Ener…
11.2	By 2030, provide access to safe, affordable, accessible and sustainable transport systems for all, improving road safety, notably by expanding public transport, with special attention to the needs of those in vulnerable situations, women, children, persons with disabilities and older persons					1	1	LPG offers an alternative vehicle fuel with lower GHG and particulate emissions. LPG for vehicle fuel can compete with LPG for cooking fuel.	(1) Kojima. 2011. The role of Liquiefied petroelum gas in reducing energy poverty. (World Bank) (2) Gan & Van Leeuwen. 2019. Sustainable Development Goals the Contribution of LPG (Global LPG Partnership (GLPGP) and the World LPG Association (WLPGA))								1	1	Strengthen Enablers	Strengthening Supply Chain	Domestic reserves of LPG improve supply security, improving the availability of the fuel for all uses, reducing, but not eliminating competition for LPG as a vehicle fuel versus cooking fuel.	Dependence on LPG imports ultimatley limits the energy sovereignty of Kenya.	(1) Kojima. 2011. The Role of Liquified Petroleum Gas in Reducing Energy Poverty (World Bank) (2) van den Berg. 2018. Kenya’s Strategy to Make Liquified Petroleum Gas the Nation’s Primary Cooking Fuel (World Bank)
11.3	By 2030, enhance inclusive and sustainable urbanization and capacity for participatory, integrated and sustainable human settlement planning and management in all countries	1		Electricity access and use can empower otherwise marginalised groups socio-economically, giving voice in planning and policy-making.	(1) Singh et al. 2014. Energy Access Realities in Urban Poor Communities of Developing Countries: Assessments and Recommendations (Global Network on Energy for Sustainable Development)	1		LPG access can empower other wise marginalised groups socio-economically, giving voice in planning and policy-making	(1) Singh et al. 2014. Energy Access Realities in Urban Poor Communities of Developing Countries: Assessments and Recommendations (Global Network on Energy for Sustainable Development)	1		Strengthen Enablers	Political Recognition Community Engagement	Political recognition of Kibera means consideration of informal settlements in national policy and decision-making and inclusion of the energy needs of households. Community engagement supports inclusive and participatory decision-making.	Policy must be context-responsive, appropriatley implemented and monitored.	(1) GNESD 2014. Country report (Kenya). Energy poverty in developing countries' urban poor communities: assessments and recommendations. Urban and Peri-urban energy access III (2) The World Bank & ESMAP. 2015. Bringing global best practices to transform Kenya's slum electrification program.	1		Strengthen Enablers	Political Recognition Strengthening Supply Chain	Consideration of informal settlements in national policy and decision-making and inclusion of the energy needs of households. Increase the number of LPG outlets and/or the establishment of local enterprises as distributors and dealers in Kibera means improved availability of LPG the creation of new jobs.	Policy must be context-responsive, appropriatley implemented and monitored.	(1) GNESD 2014. Country report (Kenya). Energy poverty in developing countries' urban poor communities: assessments and recommendations. Urban and Peri-urban energy access III. (2) van den Berg. 2018. Kenya’s Strategy to Make Liquified Petroleum Gas the Nation’s Primary Cooking Fuel (World Bank)
11.4	Strengthen efforts to protect and safeguard the world’s cultural and natural heritage	1	1	Formal, legal supply of electricity increases efficiency of use although energy stystems, e.g. hydro power, impact on natural and cultural heritage.	(1) Égré & Senécal. 2003. Social impact assessments of large dams throughout the world: lessons learned over two decades (Impact Assessment and Project Appraisal)		1	Loss of cultural heritage with decreased demand for charcoal production, due to LPG access, resulting a loss of specialised knowledge and skills in rural areas. As a fossil fuel - a byproduct from natural gas and crude oil extraction and refinement - extraction of energy resources impact on natural and cultural heritage (marine & terrestrial)	(1) Munro et al. 2017. Energy justice for all? Rethinking SDG 7 through struggles over traditional energy practices in Sierra Leone (Energy Policy) (2) Kojima. 2011. The Role of Liquified Petroleum Gas in Reducing Energy Poverty (World Bank)	1	1	Interlinkages Stand			Increased electricity consumption must be coupled with sustainable electricity production generation and distribution.	(1) Égré & Senécal. 2003. Social impact assessments of large dams throughout the world: lessons learned over two decades (Impact Assessment and Project Appraisal) (2) Kenya Power. 2019. Kenya Electricity System Improvement Project Resettlement Policy Framework (3) African Development Fund. 2014. Last Mile Connectivity Project."		1	Interlinkages Stand			LPG is a fossil fuel - a byproduct from natural gas and crude oil extraction and refinement - and therefore it's sustainability is questionable	(1) Munro et al. 2017. Energy justice for all? Rethinking SDG 7 through struggles over traditional energy practices in Sierra Leone (Energy Policy) (2) Kojima. 2011. The Role of Liquified Petroleum Gas in Reducing Energy Poverty (World Bank)
11.5	By 2030, significantly reduce the number of deaths and the number of people affected and substantially decrease the direct economic losses relative to global gross domestic product caused by disasters, including water-related disasters, with a focus on protecting the poor and people in vulnerable situations						1	LPG is a fossil fuel - a byproduct from natural gas and crude oil extraction and refinement - and Kenya is reliant on imports: a concern for supply security.	(1) Munro et al. 2017. Energy justice for all? Rethinking SDG 7 through struggles over traditional energy practices in Sierra Leone (Energy Policy) (2) Matthews 2014. Opportunities and Challenges for Petroleum and LPG Markets in Sub-Saharan Africa (Energy Policy) (3) Kojima. 2011. The Role of Liquified Petroleum Gas in Reducing Energy Poverty (World Bank)									1	Interlinkages Stand			Dependence on LPG imports ultimatley limits the energy sovereignty of Kenya. LPG is a fossil fuel - a byproduct from natural gas and crude oil extraction and refinement - and therefore it's sustainability is questionable	(1) Kojima. 2011. The Role of Liquified Petroleum Gas in Reducing Energy Poverty (World Bank) (2) van den Berg. 2018. Kenya’s Strategy to Make Liquified Petroleum Gas the Nation’s Primary Cooking Fuel (World Bank) (3) Munro et al. 2017. Energy justice for all? Rethinking SDG 7 through struggles over traditional energy practices in Sierra Leone (Energy Policy) (4) Matthews 2014. Opportunities and …
11.6	By 2030, reduce the adverse per capita environmental impact of cities, including by paying special attention to air quality and municipal and other waste management	1	1	Formal, legal supply of electricity increases efficiency of use and reduces dependence on dirty fuels. Electricity through fossil-based sources contributes to ambient air pollution.	(1) Karekezi et al. Energy Access for the Urban Poor (AFREPEN/FWD 2008) (2) International Energy Agency. 2016. Energy and Air Pollution	1		LPG is a clean burning fuel reducing ambient air pollution	(1) Gan & Van Leeuwen. 2019. Sustainable Development Goals the Contribution of LPG (Global LPG Partnership (GLPGP) and the World LPG Association (WLPGA)) (2) Bhatia et al. 2015. Beyond Connections: Redefining Energy Access (World Bank)	1	1	Strengthens Enabler Limit Inhibitor	Strengthening Supply Chain Financial Incentives	Renewable energy sources in electricity generation. Financial direct incentives do not consider source of electricity generation.	Increased electricity consumption must be coupled with sustainable electricity production generation and distribution.	(1) Égré & Senécal. 2003. Social impact assessments of large dams throughout the world: lessons learned over two decades (Impact Assessment and Project Appraisal) (2) Kenya Power. 2019. Kenya Electricity System Improvement Project Resettlement Policy Framework (3) African Development Fund. 2014. Last Mile Connectivity Project."	1		Interlinkages Stand			LPG is a fossil fuel whose production contributes to climate change which has an environmental on cities.	(1) Gan & Van Leeuwen. 2019. Sustainable Development Goals the Contribution of LPG (Global LPG Partnership (GLPGP) and the World LPG Association (WLPGA))
11.7	By 2030, provide universal access to safe, inclusive and accessible, green and public spaces, in particular for women and children, older persons and persons with disabilities
11.a	Support positive economic, social and environmental links between urban, peri-urban and rural areas by strengthening national and regional development planning	1		Electricity access through expansion of transmission and distribution grids, in urban, peri-urban and rural areas.	(1) African Development Fund. Last Mile Connectivity Project (2014)		1	LPG, as a subsitute for biomass, will reduce income for rural producers of biomass (charcoal and firewood)	(1) Munro et al. 2017. Energy justice for all? Rethinking SDG 7 through struggles over traditional energy practices in Sierra Leone (Energy Policy)	1		Interlinkages Stand			Interventions must be inclusive of residents in informal settlements.	(1) African Development Fund. Last Mile Connectivity Project (2014)	1	1	Create Enabler	Political Recognition	Consideration of informal settlements in national policy and decision-making and inclusion of the energy needs of households.	LPG, as a subsitute for biomass, will reduce income for rural producers of biomass (charcoal and firewood)	(1) Munro et al. 2017. Energy justice for all? Rethinking SDG 7 through struggles over traditional energy practices in Sierra Leone (Energy Policy)
11.b	By 2020, substantially increase the number of cities and human settlements adopting and implementing integrated policies and plans towards inclusion, resource efficiency, mitigation and adaptation to climate change, resilience to disasters, and develop and implement, in line with the Sendai Framework for Disaster Risk Reduction 2015-2030, holistic disaster risk management at all levels	1		As 11.3		1	1	As 11.3		1		Strengthen Enablers	Political Recognition	Political recognition of Kibera means consideration of informal settlements in national policy and decision-making and inclusion of the energy needs of households.	Policy must be context-responsive, appropriatley implemented and monitored.	(1) GNESD 2014. Country report (Kenya). Energy poverty in developing countries' urban poor communities: assessments and recommendations. Urban and Peri-urban energy access III	1	1	Strengthen Enablers Limits Inhibitor	Political Recognition Strengthening Supply Chain	Consideration of informal settlements in national policy and decision-making and inclusion of the energy needs of households. Increase the number of LPG outlets and/or the establishment of local enterprises as distributors and dealers in Kibera means improved availability of LPG the creation of new jobs. Domestic reserves of LPG improve supply security, improving the availability of the fuel for …	Policy must be context-responsive, appropriatley implemented and monitored.	(1) GNESD 2014. Country report (Kenya). Energy poverty in developing countries' urban poor communities: assessments and recommendations. Urban and Peri-urban energy access III. (2) van den Berg. 2018. Kenya’s Strategy to Make Liquified Petroleum Gas the Nation’s Primary Cooking Fuel (World Bank)
11.c	Support least developed countries, including through financial and technical assistance, in building sustainable and resilient buildings utilizing local materials
Goal 12. Ensure sustainable consumption and production patterns
12.1	Implement the 10-year framework of programmes on sustainable consumption and production, all countries taking action, with developed countries taking the lead, taking into account the development and capabilities of developing countries	1		As 7.3		1	1	As 7.3 LPG is a fossil fuel - a byproduct from natural gas and crude oil extraction and refinement - and therefore it's sustainability is questionable	(1) Kojima. 2011. The Role of Liquified Petroleum Gas in Reducing Energy Poverty (World Bank)	1		Interlinkage stand			Awareness programmes can include the safe and efficient use of electricity.	(1) GNESD 2014. Country report (Kenya). Energy poverty in developing countries' urban poor communities: assessments and recommendations. Urban and Peri-urban energy access III	1	1	Interlinkages Stand			LPG is a fossil fuel - a byproduct from natural gas and crude oil extraction and refinement - and therefore it's sustainability is questionable
12.2	By 2030, achieve the sustainable management and efficient use of natural resources	1		As 7.3		1	1	As 7.3 LPG is a fossil fuel - a byproduct from natural gas and crude oil extraction and refinement - and therefore it's sustainability is questionable	(1) Gan & Van Leeuwen. 2019. Sustainable Development Goals the Contribution of LPG (Global LPG Partnership (GLPGP) and the World LPG Association (WLPGA)) (2) Kojima. 2011. The Role of Liquified Petroleum Gas in Reducing Energy Poverty (World Bank)	1		Interlinkage stand			Awareness programmes can include the safe and efficient use of electricity.	(1) GNESD 2014. Country report (Kenya). Energy poverty in developing countries' urban poor communities: assessments and recommendations. Urban and Peri-urban energy access III	1	1	Interlinkages Stand			LPG is a fossil fuel - a byproduct from natural gas and crude oil extraction and refinement - and therefore it's sustainability is questionable
12.3	By 2030, halve per capita global food waste at the retail and consumer levels and reduce food losses along production and supply chains, including post-harvest losses	1		Electricity access supports refrigerators and food storage.	(1) Karekezi et al. Energy Access for the Urban Poor (AFREPEN/FWD 2008)					1		Interlinkage stand			Electricity access supports refrigerators and food storage.	(1) Karekezi et al. Energy Access for the Urban Poor (AFREPEN/FWD 2008)
12.4	By 2020, achieve the environmentally sound management of chemicals and all wastes throughout their life cycle, in accordance with agreed international frameworks, and significantly reduce their release to air, water and soil in order to minimize their adverse impacts on human health and the environment	1	1	Electricity access throuch nuclear power requires good management of waste.	(1) Republic of Kenya. Ministry of Energy. 2018. National Energy Policy	1	1	LPG, as a substitute, removes risk of spillage from kerosene and will not pollute ground or acquifers if spilt. LPG requires proper storage to ensure physical safety.	(1) Gan & Van Leeuwen. 2019. Sustainable Development Goals the Contribution of LPG (Global LPG Partnership (GLPGP) and the World LPG Association (WLPGA)) (2) Sverdlik. 2011. Ill-health and poverty: a literature review on health in informal settlements (International Institute for Environment & Development)	1	1	Interlinkage Stand			Increase in electricity consumption can release waste and chemicals from electricity generation.	(1) Republic of Kenya. Ministry of Energy. 2018. National Energy Policy	1		Strengthen Enablers Overcome Inhibitors	Strengthening Supply Chain Community Engagement	Standardise LPG cylinders and appliances and enforcement of national standards, laws, regulations and monitoring mechanisms reduces safety risk of LPG. Programmes to raise awareness educate households in the safe use and storage of LPG.	Programmes to raise awareness must be context-reponsive and consider the fuel preferences of households	(1) Kojima. 2011. The Role of Liquified Petroleum Gas in Reducing Energy Poverty (World Bank) (2) Puzzolo et al. 2019. Supply considerations for scaling up clean cooking fuels for household energy in low‐ and middle‐income countries. (GeoHealth) (3) GNESD 2014. Country report (Kenya). Energy poverty in developing countries' urban poor communities: assessments and recommendations. Urban and Peri-u…
12.5	By 2030, substantially reduce waste generation through prevention, reduction, recycling and reuse
12.6	Encourage companies, especially large and transnational companies, to adopt sustainable practices and to integrate sustainability information into their reporting cycle					1	1	Imports of LPG requires large and transnational companies as key actors. LPG is a fossil fuel - a byproduct from natural gas and crude oil extraction and refinement - and therefore it's sustainability is questionable.	(1) Kojima. 2011. The Role of Liquified Petroleum Gas in Reducing Energy Poverty (World Bank) (2) van den Berg. 2018. Kenya’s Strategy to Make Liquified Petroleum Gas the Nation’s Primary Cooking Fuel (World Bank)								1	1	Strengthen Enablers	Strengthening Supply Chain	Large and transnational companies as key actors, improving bulk-import storage facilities and port infrastructure, depots, storage and bottling facilities	LPG is a fossil fuel - a byproduct from natural gas and crude oil extraction and refinement - and therefore it's sustainability is questionable
12.7	Promote public procurement practices that are sustainable, in accordance with national policies and priorities	1		Procurement managemet can optimize future electrification programs.	(1) The World Bank & ESMAP. 2018. Kenya National Electrification Strategy Key Highlights.					1		Interlinkage Stand			Procurement managemet can optimize future electrification programs.	(1) The World Bank & ESMAP. 2018. Kenya National Electrification Strategy Key Highlights.	1		Create Enabler	Strengthening Supply Chain	Public procurement of LPG to strengthen supply chain.
12.8	By 2030, ensure that people everywhere have the relevant information and awareness for sustainable development and lifestyles in harmony with nature	1		Information and awareness about electricity access opportunitites key to adopt sustainable energy practices.	(1) The World Bank. Bringing global best practices to transform Kenya's slum electrification program (2015).	1		Access to, and education regarding, LPG can be a platform for raising awareness of sustainable development.	(1) Kojima. 2011. The Role of Liquified Petroleum Gas in Reducing Energy Poverty (World Bank)	1		Strengthens Enabler	Community Engagement	Awareness programmes can educate households in the safe and efficient use of electricity.	Programmes to raise awareness must be context-reponsive and consider the fuel preferences and practices of households	(1) GNESD 2014. Country report (Kenya). Energy poverty in developing countries' urban poor communities: assessments and recommendations. Urban and Peri-urban energy access III	1		Strengthen Enabler	Community Engagement	Programmes to raise awareness educate households in the safe use and storage of LPG.	Programmes to raise awareness must be context-reponsive and consider the fuel preferences of households	(1) Kojima. 2011. The Role of Liquified Petroleum Gas in Reducing Energy Poverty (World Bank) (2) Puzzolo et al. 2019. Supply considerations for scaling up clean cooking fuels for household energy in low‐ and middle‐income countries. (GeoHealth) (3) GNESD 2014. Country report (Kenya). Energy poverty in developing countries' urban poor communities: assessments and recommendations. Urban and Peri-u…
12.a	Support developing countries to strengthen their scientific and technological capacity to move towards more sustainable patterns of consumption and production	1	1	Technolocal capacity can enable RET for power production. Poor institutions can inhibit efficient uptake if the preferences of the host country are not taken into account.	(1) Karekezi & Kithyoma. 2003. RENEWABLE ENERGY DEVELOPMENT: The Workshop for African Energy Experts on Operationalizing the NEPAD Energy Initiative (Republic of Senegal and United Nations)					1	1	Interlinkage Stand			Technolocal capacity can enable RET for power production. Poor institutions can inhibit efficient uptake if the preferences of the host country are not taken into account.	(1) Karekezi & Kithyoma. 2003. RENEWABLE ENERGY DEVELOPMENT: The Workshop for African Energy Experts on Operationalizing the NEPAD Energy Initiative (Republic of Senegal and United Nations)
12.b	Develop and implement tools to monitor sustainable development impacts for sustainable tourism that creates jobs and promotes local culture and products
12.c	Rationalize inefficient fossil-fuel subsidies that encourage wasteful consumption by removing market distortions, in accordance with national circumstances, including by restructuring taxation and phasing out those harmful subsidies, where they exist, to reflect their environmental impacts, taking fully into account the specific needs and conditions of developing countries and minimizing the poss…	1	1	Target reduces burden on national budget which frees money to electrification programmes, provided it is complemented with financial support covering the increased electricity tariffs for the poor.	(1) Whitley & van der Burg. 2015. Fossil Fuel Subsidy Reform in Sub-Saharan Africa: From Rhetoric to Reality (New Climate Economy)		1	Inefficient LPG subsidies fail to meet targeted households meaning LPG is not affordable	(1) Singh et al. 2015. Energy access realities in urban poor communities of developing countries: assessments and recommendations (GNESD)	1		Strengthens Enabler Overcome inhibitor	Strengthening Supply Chain Financial Incentives	Target supports uptake of RET. Direct financial incentives - i.e. subsidies, flexible paying, lifeline tariffs - improves affordability of electricity for households.	Direct financial incentives must be implmeneted and monitored to ensure they reach targeted households and achieve policy goals.	(1) Singh et al. 2015. Energy access realities in urban poor communities of developing countries: assessments and recommendations (GNESD)	1		Create Enabler Overcome Inhibitor	Financial Incentives	Direct financial incentives - i.e. subsidies and removal of VAT - improves affordability of LPG for households.	Direct financial incentives must be implmeneted and monitored to ensure they reach targeted households and achieve policy goals.	(1) Singh et al. 2015. Energy access realities in urban poor communities of developing countries: assessments and recommendations (GNESD) (2) Puzzolo et al. 2019. Supply considerations for scaling up clean cooking fuels for household energy in low‐ and middle‐income countries (GeoHealth)
Goal 13. Take urgent action to combat climate change and its impacts
13.1	Strengthen resilience and adaptive capacity to climate-related hazards and natural disasters in all countries	1	1	Efficient energy planning can increase energy systems resilience. Electricity access through climate vulnerable energy sources, e.g. hydro power weakens resilience of Kenya's energy system.	(1) Berga. 2018. The Role of Hydropower in Climate Change Mitigation and Adaptation: A Review (Engineering) (2) Republic of Kenya. Ministry of Energy. 2018. National Energy Policy (3) SE4All. 2016. Kenya Action Agenda		1	LPG is a fossil fuel - a byproduct from natural gas and crude oil extraction and refinement. Kenya is reliant on imports of LPG: a concern for supply security.	(1) Munro et al. 2017. Energy justice for all? Rethinking SDG 7 through struggles over traditional energy practices in Sierra Leone (Energy Policy) (2) Matthews 2014. Opportunities and Challenges for Petroleum and LPG Markets in Sub-Saharan Africa (Energy Policy)	1	1	Strenghen Enabler Limit Inhibitor	Strengthening Supply Chain Financial Incentives	Renewable energy sources in electricity generation. Financial direct incentives do not consider source of electricity generation.	Increased electricity consumption must be coupled with sustainable electricity production generation and distribution.	(1) Berga. 2018. The Role of Hydropower in Climate Change Mitigation and Adaptation: A Review (Engineering) (2) Republic of Kenya. Ministry of Energy. 2018. National Energy Policy (3) SE4All. 2016. Kenya Action Agenda	1	1	Create Enabler	Strengthening Supply Chain	Domestic reserves of LPG improve supply security, strengthening the resilience and adaptive capacity of Kenya. LPG is a fossil fuel - a byproduct from natural gas and crude oil extraction and refinement.	Dependence on LPG imports ultimatley limits the energy sovereignty of Kenya. Production and combustion of fossil-fuel contributes to the Climate Crisis and therefore climate-related hazards and natural disasters.	(1) Kojima. 2011. The Role of Liquified Petroleum Gas in Reducing Energy Poverty (World Bank) (2) van den Berg. 2018. Kenya’s Strategy to Make Liquified Petroleum Gas the Nation’s Primary Cooking Fuel (World Bank) (3) Munro et al. 2017. Energy justice for all? Rethinking SDG 7 through struggles over traditional energy practices in Sierra Leone (Energy Policy) (4) Matthews 2014. Opportunities and …
13.2	Integrate climate change measures into national policies, strategies and planning	1	1	Electricity access can be provided through renewable as well as fossil based energy.	(1) Republic of Kenya. 2018. Ministry of Energy. National Energy Policy (2) Government of Kenya. 2018. National Climate Change Action Plan (Kenya): 2018-2022. Nairobi: Ministry of Environment and Forestry.	1	1	Increasing LPG access is a target of Kenya National Climate Change Action Plan 2018-2022. Kenya is reliant on imports of LPG - a concern for supply security - and limited national buffers stock.	(1) Government of Kenya. 2018. National Climate Change Action Plan (Kenya): 2018-2022. Nairobi: Ministry of Environment and Forestry. (2) van den Berg. 2018. Kenya’s Strategy to Make Liquified Petroleum Gas the Nation’s Primary Cooking Fuel (World Bank)	1		Strengthens Enabler Overcome Inhibitor	Strengthening Supply Chain	Integration of renewable energy sources in power production.		(1) GNESD 2014. Country report (Kenya). Energy poverty in developing countries' urban poor communities: assessments and recommendations. Urban and Peri-urban energy access III	1	1	Limit Inhibitor	Strengthening Supply Chain	Domestic reserves of LPG improve supply security, strengthening the resilience and adaptive capacity of Kenya.	Dependence on LPG imports ultimatley limits the energy sovereignty of Kenya.	(1) Government of Kenya. 2018. National Climate Change Action Plan (Kenya): 2018-2022. Nairobi: Ministry of Environment and Forestry. (2) van den Berg. 2018. Kenya’s Strategy to Make Liquified Petroleum Gas the Nation’s Primary Cooking Fuel (World Bank)
13.3	Improve education, awareness-raising and human and institutional capacity on climate change mitigation, adaptation, impact reduction and early warning	1		As 12.8		1	1	As 12.8 Kenya has no domestic reserves of LPG and reliant on imports: a concern for security of supply	(1) Kojima. 2011. The Role of Liquified Petroleum Gas in Reducing Energy Poverty (World Bank) (2) Matthews 2014. Opportunities and Challenges for Petroleum and LPG Markets in Sub-Saharan Africa (Energy Policy)	1		Strengthens Enabler	Community Engagement	Programmes to raise awareness educate households in the safe and efficient use of electricity as well as Climate Change and Sustainable Development	Programmes to raise awareness must be context-reponsive and consider the fuel preferences and practices of households	(1) GNESD 2014. Country report (Kenya). Energy poverty in developing countries' urban poor communities: assessments and recommendations. Urban and Peri-urban energy access III	1	1	Strengthen Enablers Limit Inhibitor	Strengthening Supply Chain Community Engagement	Domestic reserves of LPG improve supply security, strengthening the resilience and adaptive capacity of Kenya. Programmes to raise awareness educate households in the safe use and storage of LPG as well as Climate Change and Sustainable Development	Dependence on LPG imports ultimatley limits the energy sovereignty of Kenya.	(1) Kojima. 2011. The Role of Liquified Petroleum Gas in Reducing Energy Poverty (World Bank) (2) van den Berg. 2018. Kenya’s Strategy to Make Liquified Petroleum Gas the Nation’s Primary Cooking Fuel (World Bank)
13.a	Implement the commitment undertaken by developed-country parties to the United Nations Framework Convention on Climate Change to a goal of mobilizing jointly $100 billion annually by 2020 from all sources to address the needs of developing countries in the context of meaningful mitigation actions and transparency on implementation and fully operationalize the Green Climate Fund through its capita…
13.b	Promote mechanisms for raising capacity for effective climate change-related planning and management in least developed countries and small island developing States, including focusing on women, youth and local and marginalized communities	1		Cross-sectoral initiatives, private-public partnerships, NGOs programmes promote electricity access and climate change-related planning and management	(1) SE4All. 2016. Kenya Action Agenda (Government of Kenya)	1		Cross-sectoral initiatives, private-public partnerships, NGOs programmes promote the access to LPG and climate change-related planning and management	(1) SE4All. 2016. Kenya Action Agenda (Government of Kenya)	1		Strengthens Enabler	Political Recognition	Political recognition of Kibera means consideration of informal settlements in national policy and decision-making and inclusion of the energy needs of households.	Policy must be context-responsive, appropriatley implemented and monitored.	(1) Kenya Power. 2019. Kenya Electricity System Improvement Project Resettlement Policy Framework (2) African Development Fund. 2014. Last Mile Connectivity Project. (3)The World Bank. 2015. Bringing global best practices to transform Kenya's slum electrification program.	1		Strengthen Enabler	Strengthening Supply Chain		Cooperation and knowledge sharing above the locale of LPG supply chain and realised through existing initiatives, partnerships and programmes e.g. World Bank, GACC.	(1) GNESD 2014. Country report (Kenya). Energy poverty in developing countries' urban poor communities: assessments and recommendations. Urban and Peri-urban energy access III.
Goal 14. Conserve and sustainably use the oceans, seas and marine resources for sustainable development
14.1	By 2025, prevent and significantly reduce marine pollution of all kinds, in particular from land-based activities, including marine debris and nutrient pollution
14.2	By 2020, sustainably manage and protect marine and coastal ecosystems to avoid significant adverse impacts, including by strengthening their resilience, and take action for their restoration in order to achieve healthy and productive oceans
14.3	Minimize and address the impacts of ocean acidification, including through enhanced scientific cooperation at all levels		1	Electricity through fossil-based sources contributes to ambient air pollution.	(1) International Energy Agency. 2016. Energy and Air Pollution		1	LPG is a fossil fuel - a byproduct from natural gas and crude oil extraction and refinement - whose production contributes to ocean acidification	(1) Munro et al. 2017. Energy justice for all? Rethinking SDG 7 through struggles over traditional energy practices in Sierra Leone (Energy Policy)	1	1	Creates Enabler Limit Inhibitor	Strengthening Supply Chain Financial Incentives	Integration of renewable energy sources in power production. Financial Direct Incentives - subsidies, lifeline tariffs, flexible paying - increase electricity consumption	The increase of electricity consumption must be met by sustainable electricity generation.	(1) GNESD 2014. Country report (Kenya). Energy poverty in developing countries' urban poor communities: assessments and recommendations. Urban and Peri-urban energy access III		1	Interlinkages Stand			LPG is a fossil fuel - a byproduct from natural gas and crude oil extraction and refinement - whose production contributes to ocean acidification	(1) Munro et al. 2017. Energy justice for all? Rethinking SDG 7 through struggles over traditional energy practices in Sierra Leone (Energy Policy)
14.4	By 2020, effectively regulate harvesting and end overfishing, illegal, unreported and unregulated fishing and destructive fishing practices and implement science-based management plans, in order to restore fish stocks in the shortest time feasible, at least to levels that can produce maximum sustainable yield as determined by their biological characteristics
14.5	By 2020, conserve at least 10 per cent of coastal and marine areas, consistent with national and international law and based on the best available scientific information
14.6	By 2020, prohibit certain forms of fisheries subsidies which contribute to overcapacity and overfishing, eliminate subsidies that contribute to illegal, unreported and unregulated fishing and refrain from introducing new such subsidies, recognizing that appropriate and effective special and differential treatment for developing and least developed countries should be an integral part of the World…
14.7	By 2030, increase the economic benefits to Small Island developing States and least developed countries from the sustainable use of marine resources, including through sustainable management of fisheries, aquaculture and tourism
14.a	Increase scientific knowledge, develop research capacity and transfer marine technology, taking into account the Intergovernmental Oceanographic Commission Criteria and Guidelines on the Transfer of Marine Technology, in order to improve ocean health and to enhance the contribution of marine biodiversity to the development of developing countries, in particular small island developing States and …
14.b	Provide access for small-scale artisanal fishers to marine resources and markets
14.c	Enhance the conservation and sustainable use of oceans and their resources by implementing international law as reflected in UNCLOS, which provides the legal framework for the conservation and sustainable use of oceans and their resources, as recalled in paragraph 158 of The Future We Want
Goal 15. Protect, restore and promote sustainable use of terrestrial ecosystems, sustainably manage forests, combat desertification, and halt and reverse land degradation and halt biodiversity loss
15.1	By 2020, ensure the conservation, restoration and sustainable use of terrestrial and inland freshwater ecosystems and their services, in particular forests, wetlands, mountains and drylands, in line with obligations under international agreements	1	1	Legal electricity means efficient use of resources and reduce dependence on unsustainable fuels. Expanded transmission grids and electricity production can impact land.	(1) Karekezi et al. Energy Access for the Urban Poor (AFREPEN/FWD 2008) (2) Fritsche et al. 2007. Energy and Land Use. (UNCCD & IRENA)					1	1	Interlinkages Stand			Expansion of distribution grid network and integration of renewable energy technology can affect the environment.	(1) Kenya Power. 2019. Kenya Electricity System Improvement Project Resettlement Policy Framework (2) African Development Fund. 2014. Last Mile Connectivity Project. (3)Fritsche et al. 2007. Energy and Land Use. (UNCCD & IRENA)
15.2	By 2020, promote the implementation of sustainable management of all types of forests, halt deforestation, restore degraded forests and substantially increase afforestation and reforestation globally	1	1	As 15.1						1	1	Interlinkages Stand			Expansion of distribution grid network and integration of renewable energy technology can affect the environment.	(1) Kenya Power. 2019. Kenya Electricity System Improvement Project Resettlement Policy Framework (2) African Development Fund. 2014. Last Mile Connectivity Project. (3)Fritsche et al. 2007. Energy and Land Use. (UNCCD & IRENA)
15.3	By 2030, combat desertification, restore degraded land and soil, including land affected by desertification, drought and floods, and strive to achieve a land degradation-neutral world	1	1	As 15.1						1	1	Interlinkages Stand			Expansion of distribution grid network and integration of renewable energy technology can affect the environment.	(1) Kenya Power. 2019. Kenya Electricity System Improvement Project Resettlement Policy Framework (2) African Development Fund. 2014. Last Mile Connectivity Project. (3)Fritsche et al. 2007. Energy and Land Use. (UNCCD & IRENA)
15.4	By 2030, ensure the conservation of mountain ecosystems, including their biodiversity, in order to enhance their capacity to provide benefits that are essential for sustainable development	1	1	As 15.1 Hydro power plants for electricity generation impact mountain ecosystems.	(1) IEA. 2016. Water Energy Nexus: Excerpt from the World Energy Outlook. (International Energy Agency)					1	1	Interlinkages Stand			Expansion of distribution grid network and integration of renewable energy technology can affect the environment.	(1) Kenya Power. 2019. Kenya Electricity System Improvement Project Resettlement Policy Framework (2) African Development Fund. 2014. Last Mile Connectivity Project. (3)Fritsche et al. 2007. Energy and Land Use. (UNCCD & IRENA)
15.5	Take urgent and significant action to reduce the degradation of natural habitats, halt the loss of biodiversity and, by 2020, protect and prevent the extinction of threatened species	1	1	As 15.1			1	As 15.1 LPG is a fossil fuel - a byproduct from natural gas and crude oil extraction and refinement - whose production contributes to climate change and thus the degradation of natural habitats	(1) Munro et al. 2017. Energy justice for all? Rethinking SDG 7 through struggles over traditional energy practices in Sierra Leone (Energy Policy) (2) Matthews 2014. Opportunities and Challenges for Petroleum and LPG Markets in Sub-Saharan Africa (Energy Policy)	1	1	Interlinkages Stand			Expansion of distribution grid network and integration of renewable energy technology can affect the environment.	(1) Kenya Power. 2019. Kenya Electricity System Improvement Project Resettlement Policy Framework (2) African Development Fund. 2014. Last Mile Connectivity Project. (3)Fritsche et al. 2007. Energy and Land Use. (UNCCD & IRENA)		1	Interlinkages Stand			LPG, as a substitute for biomass, can enable sustainable management of forestry. LPG is a fossil fuel whose production contributes to climate change and thus the degredation of natural habitats.	(1) Gan & Van Leeuwen. 2019. Sustainable Development Goals the Contribution of LPG (Global LPG Partnership (GLPGP) and the World LPG Association (WLPGA))
15.6	Promote fair and equitable sharing of the benefits arising from the utilization of genetic resources and promote appropriate access to such resources, as internationally agreed
15.7	Take urgent action to end poaching and trafficking of protected species of flora and fauna and address both demand and supply of illegal wildlife products
15.8	By 2020, introduce measures to prevent the introduction and significantly reduce the impact of invasive alien species on land and water ecosystems and control or eradicate the priority species
15.9	By 2020, integrate ecosystem and biodiversity values into national and local planning, development processes, poverty reduction strategies and accounts	1	1	As 15.1						1	1	Interlinkages Stand			Expansion of distribution grid network and integration of renewable energy technology can affect the environment.	(1) Kenya Power. 2019. Kenya Electricity System Improvement Project Resettlement Policy Framework (2) African Development Fund. 2014. Last Mile Connectivity Project. (3)Fritsche et al. 2007. Energy and Land Use. (UNCCD & IRENA)
15.a	Mobilize and significantly increase financial resources from all sources to conserve and sustainably use biodiversity and ecosystems
15.b	Mobilize significant resources from all sources and at all levels to finance sustainable forest management and provide adequate incentives to developing countries to advance such management, including for conservation and reforestation
15.c	Enhance global support for efforts to combat poaching and trafficking of protected species, including by increasing the capacity of local communities to pursue sustainable livelihood opportunities
Goal 16. Promote peaceful and inclusive societies for sustainable development, provide access to justice for all and build effective, accountable and inclusive institutions at all levels
16.1	Significantly reduce all forms of violence and related death rates everywhere	1		Legal electricity access will reduce deaths and violence often associated with illegal electricity connections.	(1)The World Bank. Bringing global best practices to transform Kenya's slum electrification program (2015).					1		Strengthens Enabler	Community Engagement	Awareness programmes educate households on safe and efficient use of electricity.	Programmes to raise awareness must be context-reponsive and consider the fuel preferences and practices of households	(1) GNESD 2014. Country report (Kenya). Energy poverty in developing countries' urban poor communities: assessments and recommendations. Urban and Peri-urban energy access III						Conflicts and environemtnal justice issues above the locale of LPG supply chain	(1) Munro et al. 2017. Energy justice for all? Rethinking SDG 7 through struggles over traditional energy practices in Sierra Leone (Energy Policy) (2) Kojima. 2011. The Role of Liquified Petroleum Gas in Reducing Energy Poverty (World Bank)
16.2	End abuse, exploitation, trafficking and all forms of violence against and torture of children
16.3	Promote the rule of law at the national and international levels and ensure equal access to justice for all	1		A justice based approach can enable the provision of energy access.	(1) Sovacool et al. 2016. Energy decisions reframed as justice and ethical concerns. (Nature Energy)					1		Strengthens Enabler	Political Recognition	Political recognition of Kibera means consideration of informal settlements in national policy and law-making.	Must be inclusive of people in informal settlements.	(1) GNESD 2014. Country report (Kenya). Energy poverty in developing countries' urban poor communities: assessments and recommendations. Urban and Peri-urban energy access III	1		Creates Enabler	Political Recognition		Political recognition of Kibera means consideration of informal settlements in national policy and law-making. Enforcement of national standards, laws, regulations and monitoring mechanisms to stardardise LPG access promotes justice for all.	(1) GNESD 2014. Country report (Kenya). Energy poverty in developing countries' urban poor communities: assessments and recommendations. Urban and Peri-urban energy access III. (2) Kojima. 2011. The Role of Liquified Petroleum Gas in Reducing Energy Poverty (World Bank) (3) Puzzolo et al. 2019. Supply considerations for scaling up clean cooking fuels for household energy in low‐ and middle‐income…
16.4	By 2030, significantly reduce illicit financial and arms flows, strengthen the recovery and return of stolen assets and combat all forms of organized crime	1		Legal and formal electricity supply undermines cartels.	(1)The World Bank. 2015. Bringing global best practices to transform Kenya's slum electrification program.					1		Strengthens Enabler	Political Recognition Community Engagement	Political recognition of Kibera means consideration of informal settlements in national policy and law-making. Community Engagement supports trust building between consumer and suppliers and employment of informal electricity resellers.		(1)The World Bank. 2015. Bringing global best practices to transform Kenya's slum electrification program (The World Bank) (2) de Bercegol & Monstadt. 2018.The Kenya Slum Electrification Program. Local politics of electricity networks in Kibera. Energy Research & Social Science 4						Conflicts and environemtnal justice issues above the locale of LPG supply chain	(1) Munro et al. 2017. Energy justice for all? Rethinking SDG 7 through struggles over traditional energy practices in Sierra Leone (Energy Policy) (2) Kojima. 2011. The Role of Liquified Petroleum Gas in Reducing Energy Poverty (World Bank)
16.5	Substantially reduce corruption and bribery in all their forms	1		As 16.4						1		Strengthens Enabler	Political Recognition Community Engagement	Political recognition of Kibera means consideration of informal settlements in national policy and law-making. Community Engagement supports trust building between consumer and suppliers and employment of informal electricity resellers.		(1)The World Bank. 2015. Bringing global best practices to transform Kenya's slum electrification program (The World Bank) (2) de Bercegol & Monstadt. 2018.The Kenya Slum Electrification Program. Local politics of electricity networks in Kibera. Energy Research & Social Science 4	1		Create Enabler	Strengthening Supply Chain	Enforcement of national standards, laws, regulations and monitoring mechanisms to standardise LPG access reduce corruption and bribery in the LPG supply chain.		(1) GNESD 2014. Country report (Kenya). Energy poverty in developing countries' urban poor communities: assessments and recommendations. Urban and Peri-urban energy access III. (2) Kojima. 2011. The Role of Liquified Petroleum Gas in Reducing Energy Poverty (World Bank) (3) Puzzolo et al. 2019. Supply considerations for scaling up clean cooking fuels for household energy in low‐ and middle‐income…
16.6	Develop effective, accountable and transparent institutions at all levels	1		Insitutions to recognise the energy needs of urban poor	(1) GNESD 2014. Country report (Kenya). Energy poverty in developing countries' urban poor communities: assessments and recommendations. Urban and Peri-urban energy access III.	1		Insitutions to recognise the energy needs of urban poor	(1) GNESD 2014. Country report (Kenya). Energy poverty in developing countries' urban poor communities: assessments and recommendations. Urban and Peri-urban energy access III. Report prepared for the Global Network on Energy for Sustainable Development by The Energy, Environment and Development Network for Africa (AFREPREN/FWD)	1		Strengthens Enabler	Political Recognition	Political recognition of Kibera means consideration of informal settlements in national policy and requires defined roles and responsibilities of institutions.	Policy must be context-responsive, appropriatley implemented and monitored.	(1) GNESD 2014. Country report (Kenya). Energy poverty in developing countries' urban poor communities: assessments and recommendations. Urban and Peri-urban energy access III (2) Singh et al. 2015. Energy access realities in urban poor communities of developing countries: assessments and recommendations (GNESD)	1		Strengthen Enablers	Strengthening Supply Chain Political Recognition	Standardise LPG cylinders and appliances and enforcement of national standards, laws, regulations and monitoring mechanisms increase transparancy of LPG supply chain. Consideration of informal settlements in national policy and decision-making.		(1) GNESD 2014. Country report (Kenya). Energy poverty in developing countries' urban poor communities: assessments and recommendations. Urban and Peri-urban energy access III. (2) Kojima. 2011. The Role of Liquified Petroleum Gas in Reducing Energy Poverty (World Bank) (3) Puzzolo et al. 2019. Supply considerations for scaling up clean cooking fuels for household energy in low‐ and middle‐income…
16.7	Ensure responsive, inclusive, participatory and representative decision-making at all levels	1		Electricity access can empower other wise marginalised groups socio-economically, giving voice in planning and policy-making	(1) Singh, R. et al. Energy Access Realities in Urban Poor Communities of Developing Countries: Assessments and Recommendations (Global Network on Energy for Sustainable Development, 2014).	1		LPG access can empower other wise marginalised groups socio-economically, giving voice in planning and policy-making	(1) Singh et al. 2014. Energy Access Realities in Urban Poor Communities of Developing Countries: Assessments and Recommendations (Global Network on Energy for Sustainable Development)	1		Strengthens Enabler	Political Recognition	Political recognition of Kibera means consideration of informal settlements in national policy and requires defined roles and responsibilities of institutions.	Policy must be context-responsive, appropriatley implemented and monitored.	(1) GNESD 2014. Country report (Kenya). Energy poverty in developing countries' urban poor communities: assessments and recommendations. Urban and Peri-urban energy access III (2) Singh et al. 2015. Energy access realities in urban poor communities of developing countries: assessments and recommendations (GNESD)	1		Strengthen Enablers	Political Recognition	Consideration of informal settlements in national policy and decision-making.		(1) Singh et al. 2015. Energy access realities in urban poor communities of developing countries: assessments and recommendations (GNESD)
16.8	Broaden and strengthen the participation of developing countries in the institutions of global governance
16.9	By 2030, provide legal identity for all, including birth registration									1		Creates Enabler	Political Recognition	Political recognition of Kibera means consideration of informal settlements in national policy and inclusion in national census; reliable data enables effective policy-making, programmes and projects enabling electricity access.	Policy must be context-responsive, appropriatley implemented and monitored.	(1) GNESD 2014. Country report (Kenya). Energy poverty in developing countries' urban poor communities: assessments and recommendations. Urban and Peri-urban energy access III.	1		Create Enabler	Political Recognition	Consideration of informal settlements in national policy and inclusion in national census; reliable data enables effective policy-making, programmes and projects enabling LPG access.		(1) GNESD 2014. Country report (Kenya). Energy poverty in developing countries' urban poor communities: assessments and recommendations. Urban and Peri-urban energy access III. (2) van den Berg. 2018. Kenya’s Strategy to Make Liquified Petroleum Gas the Nation’s Primary Cooking Fuel (World Bank)
16.1	Ensure public access to information and protect fundamental freedoms, in accordance with national legislation and international agreements	1		As 12.8		1		As 12.8		1		Strengthen Enabler	Community Engagement	Programmes to raise awareness educate households in the safe and efficient use of electricity as well as information to protect fundamental freedoms.	Programmes to raise awareness must be context-reponsive and consider the fuel preferences and practices of households	(1) GNESD 2014. Country report (Kenya). Energy poverty in developing countries' urban poor communities: assessments and recommendations. Urban and Peri-urban energy access III	1		Strengthen Enabler	Community Engagement	Programmes to raise awareness	As 12.8 - awareness raising
16.a	Strengthen relevant national institutions, including through international cooperation, for building capacity at all levels, in particular in developing countries, to prevent violence and combat terrorism and crime
16.b	Promote and enforce non-discriminatory laws and policies for sustainable development	1		Electricity access can empower other wise marginalised groups socio-economically, giving voice in planning and policy-making	(1) Singh et al. 2014. Energy Access Realities in Urban Poor Communities of Developing Countries: Assessments and Recommendations (Global Network on Energy for Sustainable Development)	1		LPG access can empower otherwise marginalised groups socio-economically, giving voice in planning and policy-making	(1) Singh et al. 2014. Energy Access Realities in Urban Poor Communities of Developing Countries: Assessments and Recommendations (Global Network on Energy for Sustainable Development)	1		Strengthen Enablers	Political Recognition	Political recognition of Kibera means consideration of informal settlements in national policy and decision-making.		(1) Singh et al. 2015. Energy access realities in urban poor communities of developing countries: assessments and recommendations (GNESD)	1		Strengthen Enablers	Political Recognition	Consideration of informal settlements in national policy and decision-making.		(1) Singh et al. 2015. Energy access realities in urban poor communities of developing countries: assessments and recommendations (GNESD)
Goal 17. Strengthen the means of implementation and revitalize the global parthership for sustainable development
17.1	Strengthen domestic resource mobilization, including through international support to developing countries, to improve domestic capacity for tax and other revenue collection	1	1	Financing innovations can make electricity more affordable to lower-income households provided they reach the targeted households.	(1) Fuso Nerini et al. 2018. Mapping the Synergies and Trade-offs between energy and the Sustainable Development Goals (Nature Energy). (2) de Bercegol & Monstadt. 2018.The Kenya Slum Electrification Program: Local politics of electricity networks in Kibera (Energy Research & Social Science)	1	1	Financing innovations can make LPG more affordable to lower-income households provided they reach the targeted households.	(1) Fuso Nerini et al. 2018. Mapping the Synergies and Trade-offs between energy and the Sustainable Development Goals (Nature Energy). (2) Gan & Van Leeuwen. 2019. Sustainable Development Goals the Contribution of LPG (Global LPG Partnership (GLPGP) and the World LPG Association (WLPGA)) (3) Kojima. 2011. The Role of Liquified Petroleum Gas in Reducing Energy Poverty (World Bank)	1		Strengthen Enablers Overcome Inhibitors	Financial Incentives	Direct financial incentives - i.e. subsidies, flexible paying, lifeline tariffs - improves affordability of electricity for households.	Direct financial incentives must be implmeneted and monitored to ensure they reach targeted households and achieve policy goals.	(1) Singh et al. 2015. Energy access realities in urban poor communities of developing countries: assessments and recommendations (GNESD) (2) GNESD 2014. Country report (Kenya). Energy poverty in developing countries' urban poor communities: assessments and recommendations. Urban and Peri-urban energy access III	1		Strengthen Enablers Overcome Inhibitors	Financial Incentives	Direct financial incentives - subsidies, removal of VAT, micro-finance - improves affordability of LPG for households.	Direct financial incentives must be implmeneted and monitored to ensure they reach targeted households and achieve policy goals.	(1) GNESD 2014. Country report (Kenya). Energy poverty in developing countries' urban poor communities: assessments and recommendations. Urban and Peri-urban energy access III. (2) Puzzolo et al. 2019. Supply considerations for scaling up clean cooking fuels for household energy in low‐ and middle‐income countries. (GeoHealth) (3) Kojima. 2011. The Role of Liquified Petroleum Gas in Reducing Ener…
17.2	Developed countries to implement fully their official development assistance commitments, including the commitment by many developed countries to achieve the target of 0.7 per cent of ODA/GNI to developing countries and 0.15 to 0.20 per cent of ODA/GNI to least developed countries; ODA providers are encouraged to consider setting a target to provide at least 0.20 per cent of ODA/GNI to least deve…
17.3	Mobilize additional financial resources for developing countries from multiple sources	1		External funding can support electricity access programmes.	(1) African Development Fund. 2014. Last Mile Connectivity Project (2) SE4All. 2016. Kenya Action Agenda	1		Cross-sectoral initiatives, private-public partnerships, NGOs programmes supported by Kenya's Ministry of Energy and Petroleum to promote the use of LPG and related resource mobilisation	(1) SE4All. 2016. Kenya Action Agenda (Government of Kenya) (2) Singh et al. 2014. Energy Access Realities in Urban Poor Communities of Developing Countries: Assessments and Recommendations (Global Network on Energy for Sustainable Development) (3) Haselip et al. 2017. Reflections on experience with the global network on energy for sustainable development as a South–South global knowledge network…	1		Interlinkages Stand			External funding can support electricity access programmes.	(1) African Development Fund. 2014. Last Mile Connectivity Project (2) SE4All. 2016. Kenya Action Agenda	1		Interlinkages Stand			Mobilisation of direct financial incentives - subsidies, removal of VAT, micro-finance - to improve affordability of LPG for households realised through existing initiatives, partnerships and programmes e.g. World Bank, GACC.	(1) SE4All. 2016. Kenya Action Agenda (Government of Kenya) (2) Singh et al. 2014. Energy Access Realities in Urban Poor Communities of Developing Countries: Assessments and Recommendations (Global Network on Energy for Sustainable Development)
17.4	Assist developing countries in attaining long-term debt sustainability through coordinated policies aimed at fostering debt financing, debt relief and debt restructuring, as appropriate, and address the external debt of highly indebted poor countries to reduce debt distress	1	1	Strengthening of electricity provision requires investment in infrastructure.	(1) SE4All. 2016. Kenya Action Agenda (Government of Kenya)	1	1	Strengthening of LPG supply chain requires investment in infrastructure.	(1) SE4All. 2016. Kenya Action Agenda (Government of Kenya)	1	1	Strengthen Enabler Limit Inhibitor	Strengthening Supply Chain	Strengthening through renewable energy energy sources mean domestic, affordable and available energy for electricity production.	External funding can support electricity access programmes.	(1) African Development Fund. 2014. Last Mile Connectivity Project (2) SE4All. 2016. Kenya Action Agenda	1	1	Strengthen Enablers Limit Inhibitors	Strengthening Supply Chain
17.5	Adopt and implement investment promotion regimes for least developed countries	1		Expansion of electricity transmission and production requires investments in infrastructure.	(1) OECD. Enabling Investment in Sustainable Energy Infrastructure, OECD and Post-2015 Reflections, (Organisation for Economic Cooperation and Development)	1		Strengthening of LPG supply chain requires investment in infrastructure.	(1) SE4All. 2016. Kenya Action Agenda (Government of Kenya)	1		Interlinkages Stand			Expansion of electricity transmission and production requires investments in infrastructure.	(1) OECD. Enabling Investment in Sustainable Energy Infrastructure, OECD and Post-2015 Reflections, (Organisation for Economic Cooperation and Development)	1		Interlinkages Stand			Mobilisation of direct financial incentives and investment in LPG infrastructure realised through existing initiatives, partnerships and programmes e.g. World Bank, GACC.	(1) SE4All. 2016. Kenya Action Agenda (Government of Kenya) (2) Singh et al. 2014. Energy Access Realities in Urban Poor Communities of Developing Countries: Assessments and Recommendations (Global Network on Energy for Sustainable Development)
17.6	Enhance North-South, South-South and triangular regional and international cooperation on and access to science, technology and innovation and enhance knowledge sharing on mutually agreed terms, including through improved coordination among existing mechanisms, in particular at the United Nations level, and through a global technology facilitation mechanism	1		Cross-sectoral initiatives, private-public partnerships, NGOs programmes supports electricity access.	(1) Haselip et al. 2017. Reflections on experience with the global network on energy for sustainable development as a South–South global knowledge network (Energy for Sustainable Development)	1		As 17.3		1		Interlinkages Stand			Cross-sectoral initiatives, private-public partnerships, NGOs programmes supports electricity access.	(1) Haselip et al. 2017. Reflections on experience with the global network on energy for sustainable development as a South–South global knowledge network (Energy for Sustainable Development)	1		Interlinkages Stand			Cooperation and knowledge sharing above the locale of LPG supply chain and realised through existing initiatives, partnerships and programmes e.g. World Bank, GACC.	(1) GNESD 2014. Country report (Kenya). Energy poverty in developing countries' urban poor communities: assessments and recommendations. Urban and Peri-urban energy access III.
17.7	Promote the development, transfer, dissemination and diffusion of environmentally sound technologies to developing countries on favourable terms, including on concessional and preferential terms, as mutually agreed	1	1	As 12.a		1		As 17.3		1	1	Interlinkages stand			Renewable Energy Technology in electricity generation. Institutions to support efficient uptake if the preferences of the host country are not taken into account.	(1) African Development Fund. 2014. Last Mile Connectivity Project (2) SE4All. 2016. Kenya Action Agenda (3) Karekezi & Kithyoma. 2003. RENEWABLE ENERGY DEVELOPMENT: The Workshop for African Energy Experts on Operationalizing the NEPAD Energy Initiative (Republic of Senegal and United Nations)	1		Interlinkages Stand			Cooperation and knowledge sharing above the locale of LPG supply chain and realised through existing initiatives, partnerships and programmes e.g. World Bank, GACC.	(1) GNESD 2014. Country report (Kenya). Energy poverty in developing countries' urban poor communities: assessments and recommendations. Urban and Peri-urban energy access III.
17.8	Fully operationalize the technology bank and science, technology and innovation capacity-building mechanism for least developed countries by 2017 and enhance the use of enabling technology, in particular information and communications technology	1		Electricity access, through innovations, supports ICT.	(1) Sanyal et al. 2016. Stimulating Pay-As-You-Go Energy Access in Kenya and Tanzania: The Role of Development Finance (World Resource Institution)					1		Interlinkages stand			Electricity access, through innovations, supports ICT.	(1) Sanyal et al. 2016. Stimulating Pay-As-You-Go Energy Access in Kenya and Tanzania: The Role of Development Finance (World Resource Institution)	1		Create Enabler	Financial Incentives	Information and communications technology can enable mobile payment methods that promote LPG access such as Pay-As-You-Go Direct financial incentives - subsidies, removal of VAT, micro-finance - improves affordability of LPG for households.	Mobilisation of direct financial incentives - subsidies, removal of VAT, micro-finance - to improve affordability of LPG for households realised through existing initiatives, partnerships and programmes e.g. World Bank, GACC.
17.9	Enhance international support for implementing effective and targeted capacity-building in developing countries to support national plans to implement all the sustainable development goals, including through North-South, South-South and triangular cooperation	1		As 17.6		1		As 17.3		1		Interlinkages stand			Cross-sectoral initiatives, private-public partnerships, NGOs programmes supports electricity access.	(1) Haselip et al. 2017. Reflections on experience with the global network on energy for sustainable development as a South–South global knowledge network (Energy for Sustainable Development)	1		Interlinkages Stand			Cooperation and knowledge sharing above the locale of LPG supply chain and realised through existing initiatives, partnerships and programmes e.g. World Bank, GACC.	(1) GNESD 2014. Country report (Kenya). Energy poverty in developing countries' urban poor communities: assessments and recommendations. Urban and Peri-urban energy access III.
17.1	Promote a universal, rules-based, open, non-discriminatory and equitable multilateral trading system under the World Trade Organization, including through the conclusion of negotiations under its Doha Development Agenda
17.11	Significantly increase the exports of developing countries, in particular with a view to doubling the least developed countries’ share of global exports by 2020
17.12	Realize timely implementation of duty-free and quota-free market access on a lasting basis for all least developed countries, consistent with World Trade Organization decisions, including by ensuring that preferential rules of origin applicable to imports from least developed countries are transparent and simple, and contribute to facilitating market access
17.13	Enhance global macroeconomic stability, including through policy coordination and policy coherence	1	1	Electricity access can be met by renewable energy sources or fossil based sources.	(1) Republic of Kenya. Ministry of Energy. National Energy Policy (2018) (2) SE4All. 2016. Kenya Action Agenda	1	1	Price of LPG is elastic with global oil price therefore reliant on global macroeconomic stability	(1) Kojima. 2011. The Role of Liquified Petroleum Gas in Reducing Energy Poverty (World Bank) (2) van den Berg. 2018. Kenya’s Strategy to Make Liquified Petroleum Gas the Nation’s Primary Cooking Fuel (World Bank)	1	1	Strengthening Enabler Limit Inhibitor	Strengthening Supply Chain	Integration of renewable energy sources mean domestic, affordable and available energy.		(1) African Development Fund. 2014. Last Mile Connectivity Project (2) SE4All. 2016. Kenya Action Agenda	1	1	Interlinkages Stand			Global oil price above the locale of LPG supply chain	(1) Kojima. 2011. The Role of Liquified Petroleum Gas in Reducing Energy Poverty (World Bank) (2) van den Berg. 2018. Kenya’s Strategy to Make Liquified Petroleum Gas the Nation’s Primary Cooking Fuel (World Bank)
17.14	Enhance policy coherence for sustainable development	1		Coherent policies recognise the energy needs of the urban poor that supports sustainable development.	(1) GNESD 2014. Country report (Kenya). Energy poverty in developing countries' urban poor communities: assessments and recommendations. Urban and Peri-urban energy access III. (2) Republic of Kenya. Ministry of Energy. National Energy Policy (2018) (3) SE4All. 2016. Kenya Action Agenda	1		Coherent policies recognise the energy needs of the urban poor that supports sustainable development.	(1) SE4All. 2016. Kenya Action Agenda (Government of Kenya) (2) GNESD 2014. Country report (Kenya). Energy poverty in developing countries' urban poor communities: assessments and recommendations. Urban and Peri-urban energy access III. Report prepared for the Global Network on Energy for Sustainable Development by The Energy, Environment and Development Network for Africa (AFREPREN/FWD)	1		Strengthens Enabler	Political Recognition	Political recognition of Kibera means consideration of informal settlements in national policy and inclusion of the energy needs of households.	Policy must be context-responsive, appropriatley implemented and monitored.	(1) Singh et al. 2015. Energy access realities in urban poor communities of developing countries: assessments and recommendations (GNESD) (2) GNESD 2014. Country report (Kenya). Energy poverty in developing countries' urban poor communities: assessments and recommendations. Urban and Peri-urban energy access III	1		Strengthen Enabler	Political Recognition	Consideration of informal settlements in national policy and inclusion of the energy needs of households.	Policy must be context-responsive, appropriatley implemented and monitored.	(1) GNESD 2014. Country report (Kenya). Energy poverty in developing countries' urban poor communities: assessments and recommendations. Urban and Peri-urban energy access III. (2) van den Berg. 2018. Kenya’s Strategy to Make Liquified Petroleum Gas the Nation’s Primary Cooking Fuel (World Bank)
17.15	Respect each country’s policy space and leadership to establish and implement policies for poverty eradication and sustainable development	1		Consideration of energy sovereignty to enable energy access	(1) Castán Broto et al. 2018. Energy justice and sustainability transitions in Mozambique (Applied Energy)	1		Consideration of energy sovereignty to enable energy access	(1) Castán Broto et al. 2018. Energy justice and sustainability transitions in Mozambique (Applied Energy)	1		Strengthens Enabler	Strengthening Supply Chain	Domestic energy resources, e.g. hydro power, solar power or geothermal power, to strengthen energy sovereignty of Kenya.		(2) GNESD 2014. Country report (Kenya). Energy poverty in developing countries' urban poor communities: assessments and recommendations. Urban and Peri-urban energy access III	1		Strengthen Enabler	Strengthening Supply Chain	Domestic reserves of LPG improve supply security, strengthening the energy soverignty of Kenya.	Dependence on LPG imports ultimatley limits the energy sovereignty of Kenya	(1) Kojima. 2011. The Role of Liquified Petroleum Gas in Reducing Energy Poverty (World Bank) (2) van den Berg. 2018. Kenya’s Strategy to Make Liquified Petroleum Gas the Nation’s Primary Cooking Fuel (World Bank)
17.16	Enhance the global partnership for sustainable development, complemented by multi-stakeholder partnerships that mobilize and share knowledge, expertise, technology and financial resources, to support the achievement of the sustainable development goals in all countries, in particular developing countries	1		As 17.6		1		As 17.3		1		Interlinkages Stand			Cross-sectoral initiatives, private-public partnerships, NGOs programmes supports electricity access.	(1) Haselip et al. 2017. Reflections on experience with the global network on energy for sustainable development as a South–South global knowledge network (Energy for Sustainable Development)	1		Interlinkages Stand			Cooperation and knowledge sharing above the locale of LPG supply chain and realised through existing initiatives, partnerships and programmes e.g. World Bank, GACC.	(1) GNESD 2014. Country report (Kenya). Energy poverty in developing countries' urban poor communities: assessments and recommendations. Urban and Peri-urban energy access III.
17.17	Encourage and promote effective public, public-private and civil society partnerships, building on the experience and resourcing strategies of partnerships	1		As 17.6		1		As 17.3		1		Interlinkages Stand			Cross-sectoral initiatives, private-public partnerships, NGOs programmes supports electricity access.	(1) Haselip et al. 2017. Reflections on experience with the global network on energy for sustainable development as a South–South global knowledge network (Energy for Sustainable Development)	1		Interlinkages Stand			Cooperation and knowledge sharing above the locale of LPG supply chain and realised through existing initiatives, partnerships and programmes e.g. World Bank, GACC.	(1) GNESD 2014. Country report (Kenya). Energy poverty in developing countries' urban poor communities: assessments and recommendations. Urban and Peri-urban energy access III.
17.18	By 2020, enhance capacity-building support to developing countries, including for least developed countries and small island developing States, to increase significantly the availability of high-quality, timely and reliable data disaggregated by income, gender, age, race, ethnicity, migratory status, disability, geographic location and other characteristics relevant in national contexts	1		Reliable data enables effective policy-making, programmes and projects enabling electricity access.	(1) GNESD 2014. Country report (Kenya). Energy poverty in developing countries' urban poor communities: assessments and recommendations. Urban and Peri-urban energy access III. Report prepared for the Global Network on Energy for Sustainable Development by The Energy, Environment and Development Network for Africa (AFREPREN/FWD)	1		Reliable data enables effective policy-making, programmes and projects enabling LPG access.	(1) GNESD 2014. Country report (Kenya). Energy poverty in developing countries' urban poor communities: assessments and recommendations. Urban and Peri-urban energy access III. Report prepared for the Global Network on Energy for Sustainable Development by The Energy, Environment and Development Network for Africa (AFREPREN/FWD)	1		Strengthen Enabler	Political Recognition	Political recognition of Kibera means consideration of informal settlements in national policy and inclusion in national census; reliable data enables effective policy-making, programmes and projects enabling electricity access.		(2) GNESD 2014. Country report (Kenya). Energy poverty in developing countries' urban poor communities: assessments and recommendations. Urban and Peri-urban energy access III	1		Strengthen Enabler	Political Recognition	Consideration of informal settlements in national policy and inclusion in national census; reliable data enables effective policy-making, programmes and projects enabling LPG access.		(1) GNESD 2014. Country report (Kenya). Energy poverty in developing countries' urban poor communities: assessments and recommendations. Urban and Peri-urban energy access III. (2) van den Berg. 2018. Kenya’s Strategy to Make Liquified Petroleum Gas the Nation’s Primary Cooking Fuel (World Bank)
17.19	By 2030, build on existing initiatives to develop measurements of progress on sustainable development that complement gross domestic product, and support statistical capacity-building in developing countries	1		As 17.18		1		As 17.18		1		Interlinkages Stand			Existing initiatives, partnerships and programmes e.g. World Bank, promote electricity access	(1) GNESD 2014. Country report (Kenya). Energy poverty in developing countries' urban poor communities: assessments and recommendations. Urban and Peri-urban energy access III.	1		Interlinkages Stand			Existing initiatives, partnerships and programmes e.g. World Bank, GACC promote LPG access	(1) GNESD 2014. Country report (Kenya). Energy poverty in developing countries' urban poor communities: assessments and recommendations. Urban and Peri-urban energy access III.
	COUNT	105	42			84	38			111	25						95	21
